## Limited Dishevelled/Axin oligomerization determines efficiency of Wnt/ $\beta$ -catenin signal transduction

Wei Kan<sup>1,2#</sup>, Michael Enos<sup>1,2#</sup>, Elgin Korkmazhan<sup>3,4#</sup>, Stefan Muennich<sup>1,2</sup>, Dong-Hua Chen<sup>1</sup>, Melissa V. Gammons<sup>5</sup>, Mansi Vasishtha<sup>1,2</sup>, Mariann Bienz<sup>5</sup>, Alexander R. Dunn<sup>3,4</sup>, Georgios Skiniotis<sup>1,2</sup> and William I. Weis<sup>1,2,4\*</sup>

Departments of <sup>1</sup>Structural Biology and <sup>2</sup>Molecular and Cellular Physiology, Stanford University School of Medicine, Stanford, CA 94305 USA

<sup>3</sup>Department of Chemical Engineering, Stanford University, Stanford, CA 94305 USA

<sup>4</sup>Graduate Program in Biophysics, Stanford University, USA

<sup>5</sup>MRC Laboratory of Molecular Biology, Cambridge Biomedical Campus, Francis Crick Avenue, Cambridge CB2 0QH, UK

#These authors contributed equally to this study.

\*Correspondence: [bill.weis@stanford.edu](mailto:bill.weis@stanford.edu)

Keywords: Axin, Dishevelled, DIX domain, Wnt signaling

## SUMMARY

In Wnt/ $\beta$ -catenin signaling, the transcriptional coactivator  $\beta$ -catenin is regulated by its phosphorylation in a complex that includes the scaffold protein Axin and associated kinases. Wnt binding to its coreceptors activates the cytosolic effector Dishevelled (Dvl), leading to the recruitment of Axin and the inhibition of  $\beta$ -catenin phosphorylation. This process requires interaction of homologous DIX domains present in Dvl and Axin, but is mechanistically undefined. We show that Dvl DIX forms antiparallel, double-stranded oligomers *in vitro*, and that Dvl in cells forms oligomers typically <10 molecules at endogenous expression levels. Axin DIX (DAX) forms small single-stranded oligomers, but its self-association is stronger than that of DIX. DAX caps the ends of DIX oligomers, such that a DIX oligomer has at most four DAX binding sites. The relative affinities and stoichiometry of the DIX-DAX interaction provide a mechanism for efficient inhibition of  $\beta$ -catenin phosphorylation upon Axin recruitment to the Wnt receptor complex.

## INTRODUCTION

The Wnt/ $\beta$ -catenin signaling pathway mediates cell fate specification during embryogenesis and tissue renewal in the adult (Nusse and Clevers, 2017). In this pathway, secreted Wnt proteins activate growth control genes by stabilizing the transcriptional co-activator  $\beta$ -catenin. In the absence of a Wnt signal, a cytosolic pool of  $\beta$ -catenin is bound in a “destruction complex” that contains the scaffold protein Axin, the kinases GSK-3 and CK1, and the adenomatous polyposis coli protein (APC); phosphorylation of  $\beta$ -catenin leads to its ubiquitylation and destruction by the proteasome (Stamos and Weis, 2013). Wnt binding to its cell surface receptors inhibits  $\beta$ -catenin destruction, and the stabilized  $\beta$ -catenin translocates to the nucleus and activates Wnt target genes through association with TCF/LEF transcription factors (Cadigan and Waterman, 2012). Inappropriate activation of the pathway by mutations that inactivate  $\beta$ -catenin destruction is associated with a number of cancers (Clevers and Nusse, 2012; MacDonald et al., 2009; Nusse and Clevers, 2017).

Wnt binding to two co-receptors, the 7-transmembrane helix receptor Frizzled (Fzd) and the single pass transmembrane receptor LDL receptor-related protein 5 or 6 (LRP5/6) (MacDonald and He, 2012), brings the receptors into close proximity. A current model for signal transduction is that ligand-bound Fzd recruits the cytosolic protein Dishevelled (Dvl), which then binds to Axin and thereby recruits the destruction complex to the activated receptor complex. In this complex, Axin-bound GSK-3 phosphorylates proline/serine-rich motifs in the LRP5/6 cytoplasmic tail, which then inhibit GSK-3 and hence  $\beta$ -catenin phosphorylation and destruction (MacDonald and He, 2012; Stamos et al., 2014; Stamos and Weis, 2013). Dvl self-association may contribute to formation of a multimeric and possibly phase-separated “signalosome” containing multiple copies of the receptor complex and its associated cytoplasmic components (Gammons and Bienz, 2018; Schaefer and Peifer, 2019).

The Dvl-Axin interaction is essential for Wnt/ $\beta$ -catenin signal transduction and is mediated by a DIX (Dvl and Axin interacting) domain present in each protein (Cliffe et al., 2003; Fiedler et al., 2011; Julius et al., 2000; Kishida et al., 1999; Smalley et al., 1999). Dvl has an N-terminal DIX domain, as well as a PDZ and a DEP domain; the DEP domain mediates the interaction with Fzd (Gammons et al., 2016b; Tauriello et al., 2012). Axin contains binding sites for APC, GSK-3,  $\beta$ -catenin and CK1 (Behrens et al., 1998; Hart et al., 1998; Ikeda et al., 1998; Kishida et al., 1999) and a C-terminal DIX domain. In this paper, we call the Axin DIX domain DAX in order to distinguish it from Dvl DIX (Bienz, 2014). In crystal structures, DIX domains from Axin and Dvl form head-to-tail helical polymers (Liu et al., 2011; Madrzak et al., 2015; Schwarz-Romond et al., 2007a; Yamanishi et al., 2019b), and Dvl DIX has been seen to form filaments in negative stain electron microscopy (EM) (Schwarz-Romond et al., 2007a). Mutations that disrupt the head-to-tail interactions in either protein interfere with signaling, indicating that the DIX-DAX interaction is essential (Fiedler et al., 2011). Overexpression of fluorescently tagged Axin or Dvl produces large puncta visible by optical microscopy, and these puncta are lost when these mutations are introduced (Fiedler et al., 2011; Schwarz-Romond et al., 2007a; Schwarz-Romond et al., 2005;

Schwarz-Romond et al., 2007b). Based on these findings, it has been proposed that Axin self-associates via DAX in the destruction complex. Upon Wnt signaling, it is thought that Dvl self-associates via its DIX domain as well as dimerization of its DEP domain (Gammons and Bienz, 2018; Gammons et al., 2016a), and subsequently recruits Axin by co-polymerization of the DIX and DAX domains into a filamentous oligomer (Bienz, 2014; Cliffe et al., 2003). It has also been suggested that the interaction with Dvl may compete with APC for Axin, thereby disrupting the destruction complex (Fiedler et al., 2011; Mendoza-Topaz et al., 2011).

The extent of filament/oligomer formation by endogenous Dvl and Axin, and how their relative stoichiometries in signaling complexes control GSK-3 activity and  $\beta$ -catenin destruction, are essential but unresolved questions (Gammons et al., 2016b; Schaefer et al., 2018). Here, we examine the interaction of Axin and Dvl DIX domains, using structural and biochemical analyses of purified DIX and DAX domains, and assessing the role of these domains when the proteins are present at endogenous levels. We found that purified Dvl DIX in solution forms antiparallel, double-stranded filaments whose stability depends on the inter-strand interactions in the double helix. At endogenous expression levels in HEK293T cells, Dvl forms oligomers on the order of 10 molecules. Unlike Dvl, Axin DAX does not form a double-stranded structure, and forms only modestly sized oligomers even though its self-association is approximately 10x stronger than that of DIX. Our evidence indicates that DAX caps the ends of DIX oligomers, such that at most four DAX molecules can associate with a DIX oligomer. These data suggest molecular mechanisms for efficient inhibition of GSK-3 mediated  $\beta$ -catenin phosphorylation upon Axin recruitment to the Wnt receptor complex.

## RESULTS

### DIX forms an antiparallel double helix that stabilizes filaments

We produced DIX filaments by cleaving purified maltose-binding protein (MBP)-DIX fusion protein, which does not polymerize, with tobacco etch virus (TEV) protease (Fig. 1a). The purified filaments run as a broad peak in size exclusion chromatography (SEC) with a size range of 4.9-9.5 MDa determined by Multi-Angle Light Scattering (MALS) (Fig. 1b). The concentration dependence of filament formation was measured by a centrifugation assay in which the relative amount of soluble and pelleted filaments is determined by the intensity of the DIX band on an SDS-PAGE gel (Fig. 1c,d). Sedimentable filaments were observed starting at a concentration of  $\sim 12 \mu\text{M}$  (Fig. 1c,d), which is somewhat surprising given estimates of an intrinsic DIX-DIX  $K_D$  of 5-20  $\mu\text{M}$  obtained by analytical ultracentrifugation (Schwarz-Romond et al., 2007a) and

fluorescence polarization of mutants designed to probe dimer formation (Yamanishi et al., 2019a).

We obtained a cryo-electron microscopy (cryo-EM) map of the DIX filaments with a global resolution of 3.6 Å, which enabled a near atomic resolution structure (Fig. 2, Fig. S1, Table S1). Remarkably, unlike the single stranded fibers observed in crystals of Dvl2 DIX domains (Madrzak et al., 2015; Yamanishi et al., 2019b), in solution the Dvl2 DIX filament forms an antiparallel double helix (Fig. 2b,c). Successive protomers in the filament are related by a rotation of  $48.0 \pm 0.2^\circ$  around the helical axis, with a rise of  $13.5 \pm 0.3$  Å per protomer. The pitch of the helix is 101.3 Å, larger than the pitch of the single stranded helix observed in crystals of Dvl2 Y27D (85 Å) and Y27W/C80S (88 Å) (Madrzak et al., 2015; Yamanishi et al., 2019b). Interestingly, antiparallel packing of Dvl1 Y17D DIX domains were observed in a crystal structure (Liu et al., 2011), although the pitch was considerably larger (140 Å).

We verified the accuracy of the structure by mutating residues that mediate contacts between protomers in a single strand, and between strands in the double helix. The head-to-tail interface within each strand is similar to that observed in crystal structures. For example, Y27 packs against F56 and K68 of a neighboring protomer (Fig. 2d). The mutation Y27D is known to disrupt filament formation (Liu et al., 2011), and the purified Y27D mutant runs mostly as a monomer on SEC (Fig. 3a and see below). We next tested the role of the inter-strand contacts that form the antiparallel double helix (Fig. 3b). These contacts are formed between two opposing protomers, principally by the  $\beta$ 3- $\beta$ 4 (residues 60-66) and  $\beta$ 4- $\beta$ 5 (residues 82-84) loops. Some residues on the  $\beta$ 3- $\beta$ 4 loop (e.g., D63) participate in intra- and inter-strand interactions, whereas others appear to be involved solely in inter-strand contacts, including M60, G65 and N82. Mutating each of these last three residues individually reduced the apparent size of the DIX oligomer on SEC (Fig. 3a), but they run larger than the monomeric Y27D, consistent with their ability to form intra-strand head-to-tail interactions. The G65D mutant, however, runs smaller than the others (Fig. 3a, S3a), suggesting that the unique conformation of the loop at this position may not tolerate substitution with another residue, or that the mutation might affect head-to-tail interactions as well. Several of these inter-strand mutants were reported earlier, based on antiparallel strand-strand interactions in Dvl1 Y17D crystals (Liu et al., 2011) that are very similar to those observed in the present filament structure.

We tested the effects of the Dvl2 DIX structure-based mutants in a luciferase-based reporter (TOPFLASH) assay that measures Wnt-stimulated  $\beta$ -catenin/TCF-stimulated transcription (Molenaar et al., 1996), expressing mutant Dvl2 constructs in Dvl triple knockout (TKO) cells (Gammons et al., 2016b) cells at near-endogenous levels and normalizing the luciferase signal by the expression level of the mutant relative to wild-type Dvl2 (Fig. 3c, S2). As reported previously (Schwarz-Romond et al., 2007a), the Y27D mutation reduces signaling to near background levels, even though it can bind DAX (Yamanishi et al., 2019a). In contrast, the inter-strand contact mutants reduced signaling substantially, but varied in their level of suppression (Fig. 3c),

consistent with earlier studies that used overexpression of Dvl2 constructs (Liu et al., 2011).

The structural, biochemical and signaling data indicate that the double stranded DIX filament is stabilized by inter-strand, antiparallel contacts that are functionally important. These contacts reinforce the head-to-tail interactions such that large assemblies begin to form at lower concentrations than would be predicted from the head-to-tail  $K_D$  alone (Fig. 1c, d). The data also indicate that a stable oligomer containing these anti-parallel strands is needed for signaling.

### **Axin DAX oligomerizes through a head-to-tail interface but does not form large polymers**

Unlike Dvl2 DIX, Axin DAX runs on SEC in a peak with an abrupt rise and a long tail, at a volume that corresponds to a size much smaller than DIX filaments (Figs. 4a, S3a) (the protein was injected at 60 or 180  $\mu\text{M}$  and is diluted approximately 12x, so the peaks correspond to concentrations of 5-15  $\mu\text{M}$ ). SEC-MALS analysis revealed that purified DAX forms small oligomers in a concentration-dependent manner. At the highest concentration measured, 24  $\mu\text{M}$  (a concentration at which DIX forms filaments; Fig. 1c,d), it formed on average octamers (Fig. 4b, Table S2). At the lowest concentration point of 0.7  $\mu\text{M}$ , the average mass of 15 kDa likely represents a mixture of roughly 40% monomer with multiple higher-order oligomers, corresponding to an apparent  $K_D$  of about 0.9  $\mu\text{M}$  for the homomeric DAX-DAX interaction (Table S3). This is considerably stronger than previously published estimates that employed DAX mutants designed to produce isolated dimers (Fiedler et al., 2011; Yamanishi et al., 2019a), and importantly, is stronger than the estimated homomeric DIX-DIX affinity of 5-20  $\mu\text{M}$  (Fig. 1c,d and (Schwarz-Romond et al., 2007a; Yamanishi et al., 2019a)).

Previous results have suggested that the regions of Axin N-terminally adjacent to its DAX domain, which were named the “D” (dimerization) and “I” (inhibition) domains, might modulate Axin oligomerization (Luo et al., 2005). SEC-MALS analysis of a purified construct containing the D, I and DAX domains (DI-DAX) indicates that it oligomerizes comparably to WT DAX (Table S2). Moreover, SEC-MALS analysis of purified DI-DAX Y760D, which is the mutation equivalent to DIX Y27D, shows it to be monomeric (Table S2). Thus, it appears that the D and I regions do not affect the oligomeric state of DAX, and the protomers interact through the head-to-tail interface.

We sought to understand sequence differences between DIX and DAX that would contribute to their very different oligomerization behaviors. The position equivalent to N82 of DIX is DAX E815 (Fig. S4); we showed above that N82D destabilized filament formation by DIX, likely due to charge-charge repulsion with D63, the residue equivalent to DAX E794, on the opposed strand (Fig. 4c, S4). Sequence and structure alignments revealed that relative to DIX, DAX contains a two-residue insertion, D796-C797, in the  $\beta 3$ - $\beta 4$  loop (Schwarz-Romond et al., 2007a) (Fig. 4c, S4). In Dvl2, this loop (residues 60-66) packs against the opposing strand (Fig. 3b, 4c). The

insertion, which occurs between the equivalent DIX residues 64 and 65, would therefore be expected to sterically disable formation of the inter-strand contacts needed for double helix formation. We produced a chimeric protein, designated DIX<sub>64\*DC\*65</sub>, with this insertion. Dvl2 DIX residues 60 and 61 also form part of the inter-strand interface, so we prepared DIX<sub>60\*DE\*61</sub> that contains a two-residue insertion between residues 60 and 61 that would expand this loop into and disrupt the inter-strand interface. Neither of these mutant Dvl2 DIX domains formed filaments, and each sized at roughly 2-4 monomers (Fig. S3). While we cannot rule out the possibility that the insertion of DC after F64 disrupts the head-to-tail interactions centered on V67 and K68 (Fig. 2d), the chromatograms show that DIX<sub>64\*DC\*65</sub> runs larger than the corresponding monomer mutant, DIX<sub>64\*DC\*65</sub>/Y27D, as does DIX<sub>60\*DE\*61</sub> (Fig. S3). Combined with the presence of a distinct 'tail' (likely reflecting an equilibrium among oligomers of different length) in the DIX<sub>64\*DC\*65</sub> chromatogram that is absent in the DIX<sub>64\*DC\*65</sub>/Y27D chromatogram, these data suggest that the head-to-tail interactions are at least partially intact in the DIX<sub>64\*DC\*65</sub> mutant.

Next, we used the DIX structure to predict changes that would enable human Axin1 DAX to form filaments. We changed two acidic residues to their equivalent positions in DIX (E815N/E816G), alone or in combination with changing two charged residues in the  $\beta$ 3- $\beta$ 4 loop to their neutral equivalents (D793N/E794Q). These DAX mutants ("NG" or "NQ/NG") formed double-stranded filaments as assessed by SEC and electron microscopy (Figs. 4a,d). The E815 change appears to be critical, as the equivalent N82 in DIX forms an inter-strand hydrogen bond with D63 (Fig. 3b, 4c), and a negative charge introduced at N82 destabilizes double-stranded filament formation in DIX (Fig. 3a). Overall, the data indicate that the inter-strand interactions in the double helix stabilize the DIX filament once a certain number of monomers are incorporated in a single strand, and that the DAX oligomer is small due to the inability to form inter-strand contacts.

### **Axin DAX caps Dvl DIX oligomers**

To test directly whether DAX and DIX can co-polymerize, as proposed in Axin recruitment models (Bienz, 2014), we mixed purified DAX with pre-formed DIX filaments in different ratios and asked whether DAX would co-sediment with DIX. Surprisingly, addition of Axin DAX reduced Dvl2 DIX filament size to the point that much of the protein no longer sedimented (Fig. 5a, b). We confirmed these results using a total internal reflection fluorescence microscopy (TIRF) assay in which fluorescently labeled DIX filaments were mixed with unlabeled purified DAX protein. This produced a marked increase in mean fluorescence within the field of view (Figs. 5c, S5), presumably due to an increase in small DIX oligomers whose size is below the diffraction limit. A native gel shift assay also showed a reduction in the size of DIX oligomers upon addition of DAX (Fig. S6). Interestingly, the DIX domain of the Wnt activator Ccd1 was also shown to disrupt Dvl DIX filaments (Liu et al., 2011).

To test whether the ability of DAX to disrupt DIX filaments requires insertion of DAX into one strand of a DIX filament, we repeated the sedimentation assay using DAX variants with mutations in their head (Y760D) or tail (V800A/F801A) that block the intra-strand interaction (Fiedler et al., 2011). Both mutants were able to solubilize the DIX filaments (Fig. 5b). However, DAX mutated in both the head and tail interfaces, Y760D/V800A/F801A, failed to solubilize the DIX filament (Fig. 5b). These results indicate that Axin DAX solubilizes Dvl DIX via its head-to-tail interface. With an input concentration of 10  $\mu$ M DIX, the half-maximal loss of sedimentation occurred at approximately 15  $\mu$ M DAX (Fig. 5b). This concentration dependence was also observed in the native gel shift experiment (Fig. S6). These data indicate that the DAX-DIX interaction is at best comparable to the homotypic DIX-DIX interaction, and weaker than the DAX-DAX interaction, observations consistent with previous NMR analyses (Fiedler et al., 2011).

The ability of the head or tail mutants to solubilize DIX filaments suggests that DAX does so by capping (Fig. 5d). FRAP measurements of Dvl-GFP expressed in cells indicate that Dvl polymers are highly dynamic (Schwarz-Romond et al., 2007a; Schwarz-Romond et al., 2005; Schwarz-Romond et al., 2007b). These findings suggest that DAX can incorporate into a dynamic DIX filament by its head-to-tail interface (Fig. 5d). Because DAX cannot form the inter-strand interaction, this locally destabilizes the DIX filament, resulting in severing of large filaments *in vitro* (Fig. 5d). The fact that approximately 40% of the DIX still sediments even with a fivefold molar excess of DAX is likely due in large part to the relatively weak DIX-DAX  $K_D$  of 10-20  $\mu$ M (Yamanishi et al., 2019a). Furthermore, DAX insertions near the ends of DIX filaments would consume DAX while only shifting a small portion of the DIX contained in that filament from the pellet to the supernatant. Likewise, DAX insertion into a DIX oligomer that is already too small to sediment (the likelihood of which would increase as the number of severed DIX oligomers increased) would consume DAX without shifting any DIX from the pellet to the soluble fraction.

The role of oligomer stability in determining the DAX-DIX interaction was examined further by assessing the role of a continuous electronegative groove that runs along the DIX filament (Fig. S7a). The acidic residues that form this groove are strongly conserved in most Dvl proteins, but not Axin (Fig. S4). We hypothesized that this feature is important to Dvl2 function and mutated two of the acidic residues, E22 and E24, to either glutamines (“QQ”) or lysines (“KK”), to reduce the negatively charged character of the groove. These residues do not contribute to the head-to-tail interaction in the DIX filament structure, and both the QQ (Fig. S7b) and KK mutants (data not shown) formed double helical filaments. Remarkably, neither mutant could be solubilized by DAX in the sedimentation assay (Fig. S7c). Also, the mutants showed nearly 100% sedimentation, vs. 80% in the WT case (Fig. S7c), suggesting that they are more stable. Both pairs of mutations significantly impaired Dvl2 signaling (Fig. S7d). We hypothesize that the acidic residues tune DIX oligomer stability such that it can be severed by Axin; the QQ or KK mutations hyperstabilize the double stranded oligomer and thereby prevent binding of Axin indirectly by making the energetic penalty for incorporation much higher than in wild-type DIX. We cannot rule out that the mutations



directly affect DAX affinity for DIX, as a recent structure of a non-filament forming DIX-DAX heterodimer revealed that E24 interacts with K789 on DAX (Yamanishi et al., 2019a). In this scenario, replacing E24 with lysine would be expected to disrupt this interaction, but the glutamine substitution would be tolerated. However, as the QQ and KK mutants display significant and identical TOPFLASH signals (Fig. S7d), it seems more likely that the E24-K789 interaction does not contribute significantly to the DIX-DAX interaction.

### **Avidity enables Axin recruitment by Dvl2 to drive signaling**

We hypothesized that the DIX oligomer produced by double strand formation provides avidity (*i.e.*, multiple binding sites) that compensates for the intrinsically weak DAX-DIX interaction. To test this hypothesis, we assayed the ability of Dvl2 constructs bearing varying degrees of affinity and avidity for Axin binding to restore TOPFLASH signaling in Dvl TKO cells. The DIX insertion mutants DIX<sub>60</sub>\*DE\*61 and DIX<sub>64</sub>\*DC\*65 that disrupted the inter-strand interface (Fig. S3) also ablated signaling (Fig. 6). Based on this observation, we expected that replacing the Dvl2 DIX domain with Axin1 DAX, which likewise cannot form double-stranded oligomers, would behave similarly. Remarkably, however, the DAX swap more than quadrupled the signal relative to wild-type DIX (Fig. 6). We suggest that this result reflects the higher affinity of the DAX-DAX interaction, which can compensate for the loss of avidity resulting from the formation of single-stranded oligomers. This idea is consistent with several observations. First, replacing the Dvl2 DIX domain with the DAX NG or NQ/NG variants, which can form double-stranded oligomers, reduces signaling relative to the WT DAX swap (Fig. 6). Also, the hyperstabilized Dvl2 DIX QQ and KK mutants reduce signaling relative to WT DIX (Fig. S7). These data indicate that there is a balance between the avidity provided by the double stranded oligomer and the energetic penalty that it produces for binding WT DAX.

We further probed the role of avidity for Axin by testing the ability of Dvl2 constructs containing a ring-shaped heptameric protein, Sm1 from *Archaeoglobus fulgidus* (Törö et al., 2002), to restore TOPFLASH signaling (Fig. 6). Dvl2 with Sm1 but lacking a DIX domain did not restore signaling, nor did a construct with Sm1 and the non-polymerizing Y27D DIX domain, which can bind DAX (Yamanishi et al., 2019a) (Fig. 6). In contrast, Dvl2 containing both Sm1 and a wild-type DIX domain signaled at ~3-fold higher levels than wild-type Dvl2. Thus, the presence of the Sm1 heptamer combined with native DIX enhances signaling, which we interpret as an enhancement of avidity for Axin.

We next tested the combination of Sm1 with the DAX domain in Dvl2 but found no significant enhancement of signaling (Fig. 6), suggesting that the native DAX-DAX interaction provides sufficiently high affinity to recruit Axin to the receptor complex. However, while replacing the Dvl2 DIX domain with the non-polymerizing Axin1 DAX Y760D significantly reduced signaling, combining Sm1 with DAX Y760D restored signaling to the same level as that of wild-type Dvl2 (Fig. 6). As Y760D can only form a

single DAX-DAX interaction with endogenous Axin, this result indicates that Sm1 oligomerization provides a means to recruit a sufficient number of Axin molecules for wild-type level signaling.

The correlation of signaling with improved Axin recruitment is also supported by the replacement of Dvl2 DIX with the Tankyrase2 SAM domain (Fig. 6). Like DIX domains, SAM domains form head-to-tail assemblies (Bienz, 2014). Although the SAM domain does not bind to Dvl or Axin, it does oligomerize Tankyrase2, which in turn binds Axin (Mariotti et al., 2016). That the Tankyrase 2 SAM replacement restores signaling likely indicates that the SAM domain present in the Dvl2 construct indirectly recruit Axin via endogenous Tankyrases.

### **The size of Dvl oligomers is limited in cells**

When Dvl or Axin fused to a fluorescent protein is overexpressed, activation of Wnt signaling produces membrane-proximal puncta containing Dvl and Axin (e.g., (Cliffe et al., 2003; Pronobis et al., 2017; Schwarz-Romond et al., 2007b)). The ability of DVL or Axin to form puncta correlates with the ability of purified DIX domains to oligomerize, and in the case of Dvl DIX, form filaments. Moreover, Dvl DIX polymerization mutants prevent signaling (Fiedler et al., 2011; Schwarz-Romond et al., 2007a) (Figs. 3c, 5), indicating that oligomerization of Dvl is necessary for signal transduction. However, the extent to which Dvl oligomerizes at endogenous levels has not been established (Gammons et al., 2016b; Ma et al., 2020; Schaefer et al., 2018; Smalley et al., 2005). Using HEK293T cells in which a C-terminal GFP fusion was knocked into the endogenous Dvl2 locus, we performed live epifluorescent imaging with and without Wnt3A stimulation. Although we confirmed that the cell line expressed Dvl2 at the same level as wild-type HEK293T cells and responded to Wnt3a stimulation (Fig. S8), we failed to observe the multiple large Dvl clusters seen in overexpression studies. Irrespective of Wnt 3A stimulation, most cells had diffuse signal; ~20% had 1-2 observable and stable puncta, and ~2% had more than 2 such puncta (Supplemental video 1). These observations confirm recent findings that Dvl at endogenous expression levels showed few large clusters other than the likely MTOC/centrosome associated puncta (Gammons et al., 2016b; Ma et al., 2020).

Wnt-activated Fzd has been thought to recruit Dvl to the membrane and activate Dvl oligomerization as the first step in signalosome formation (Gammons et al., 2016a; Gammons et al., 2016b; Nusse and Clevers, 2017). We therefore utilized TIRF to image Dvl2-GFP near the membrane to achieve high spatiotemporal resolution with high signal-to-noise ratio. To avoid issues of ligand accessibility we developed an apical TIRF imaging setup (Jaykumar et al., 2016) in which the cells grown on PET filters are inverted with their apical sides down, with or without Wnt3A stimulation (Fig. 7a,b). In both cases we observed many diffraction-limited low intensity spots per cell, indicative of complexes containing small numbers of GFPs. Approximately 10% of cells displayed 1-2 large puncta, some of which may be MTOC-associated Dvl, and rarely displayed more than 2 large puncta. Some of the diffraction-limited spots exhibited step

photobleaching corresponding to single GFP photobleaching events. We performed single-particle tracking (Jaqaman et al., 2008), inferred the approximate single GFP intensity using Gaussian mixture models fitted to intensity distributions, and found that 90% of the spot intensities were within 10x of a single GFP intensity with or without Wnt3A stimulation (Fig. 7c). Moreover, we could not detect a significant difference in the number of Dvl2-GFP molecules in these spots upon Wnt3A stimulation. Our results strongly suggest that at endogenous levels, membrane associated Dvl2-containing complexes rarely contain more than about 10 Dvl2 molecules, with or without Wnt3a stimulation.

## DISCUSSION

Our data indicate that the Dvl DIX oligomer must have a sufficient number of monomers to form the double stranded structure found in the filaments: disrupting the inter-strand interface reduces signaling, implying that the double stranded DIX oligomer structure is functionally relevant. Although the formation of DIX filaments *in vitro* reflect fundamental properties of DIX-DIX interactions, the TIRF imaging data (Fig. 7) indicate that a typical Dvl oligomer contains fewer than 10 molecules. We do not know the smallest stable double stranded oligomeric unit of DIX. The more severe effects of the head-to-tail interface mutations on size (Figs. 3a, S3) and signaling (Fig. 3c) suggest that there must be at least 4 DIX protomers (i.e., a pair of head-tail dimers) to form a stable double-stranded structure.

The *in vitro* DIX filament severing activity of Axin DAX, combined with the inability of DAX to form the antiparallel inter-strand interface found in DIX filaments, implies that DAX binds to the ends or “caps” the end of a double-stranded DIX oligomer (Figs. 5d, 8). Binding to each end of each strand would result in at most 4 Axin protomers associated with a given Dvl multimer. The TIRF data (Fig. 7c), however, may not distinguish binding of Axin to the ends of a short, pre-existing DIX oligomer versus severing of small oligomers (Fig. 5d) in a subpopulation of molecules. These scenarios are not mutually exclusive. Severing would be consistent with the weakened signaling of the E22Q/E24Q and E22K/E24K mutants, which appear to form hyperstabilized filaments (Fig. S7). Severing might also explain the observation that mild overexpression of Dvl did not significantly affect wingless signaling (Schaefer et al., 2020). Crucially, capping and/or severing are distinct from models in which the Axin interaction with Dvl occurs by co-polymerization of DAX and DIX (Bienz, 2014), which would not limit the number of Axin molecules associated with Dvl.

Wnt binding results in recruitment of Axin to the receptor complex in a Dvl-dependent manner (Cliffe et al., 2003), and prior models have postulated that Wnt binding to Fzd and LRP5/6 promotes Dvl oligomerization needed for Axin binding (Gammons et al., 2016a; Gammons et al., 2016b; Nusse and Clevers, 2017). However, our TIRF data (Fig. 7c), as well as those of Ma et al. (Ma et al., 2020), indicate that there is not a major change in the oligomeric state of Dvl at the membrane upon Wnt activation. Thus, how Wnt binding to its receptors “activates” Dvl for Axin recruitment

remains unclear. Although we did not detect a statistically significant effect of Wnt stimulation on Dvl2 oligomer size, we do not rule out a change in oligomeric state that retains the same total number of Dvl molecules in a diffraction-limited spot. We also cannot formally rule out that a much larger Dvl oligomer forms transiently upon Wnt signaling and is subsequently severed by Axin. Improved imaging with high time resolution may allow us to address these possibilities.

The DIX-DIX interaction has a  $K_D$  in the 5-20  $\mu\text{M}$  range (Schwarz-Romond et al., 2007a; Yamanishi et al., 2019a), and our data are consistent with this estimate (Fig. 1c,d). Attempts to measure DAX-DAX or DAX-DIX affinities have employed head-to-tail mutants with the goal of isolating the affinity of a single interface. These experiments have suggested  $K_D$  values much weaker than that of DIX-DIX (Fiedler et al., 2011; Schwarz-Romond et al., 2007a; Yamanishi et al., 2019a). The filament disruption experiments (Figs. 5, S6) indicate that the affinity of the heterotypic DIX-DAX interaction is on the same order as that of DIX-DIX. However, our SEC-MALS data indicate that the DAX-DAX interaction is roughly an order of magnitude stronger than that of DIX-DIX or DIX-DAX (Fig. 4b, Table S2, Table S3). The mutants used in the other studies of DAX-DAX interactions may have effects beyond the presumed simple disruption of the head-to-tail interface; for example, interfaces may be energetically coupled, rather than independent of one another as is assumed in the mutational experiments.

The  $\beta$ -catenin destruction complex is thought to be assembled by oligomerization of Axin through its DAX domain and binding of Axin to APC. The complex may be a phase-separated structure that enables efficient  $\beta$ -catenin destruction due to the high local concentration of its enzymes and substrates (Schaefer and Peifer, 2019). Scaffold proteins with multiple binding sites for each other can crosslink to form phase separated structures; if one component is in excess, however, the crosslinking probability is diminished and phase separation does not occur (Banani et al., 2016). Imaging of Axin and APC overexpressed in mammalian cells has revealed roughly equal amounts of the two proteins in destruction complex puncta (Schaefer et al., 2018). Given that APCs contain multiple Axin-binding SAMP repeats and a conserved self-association region (Kunttas-Tatli et al., 2014), the limited DAX oligomerization observed *in vitro* seems well-matched to the number of Axin binding sites in APC, consistent with the proposed phase separation. The ability of  $\beta$ -catenin to bind to both APC and Axin simultaneously (Ha et al., 2004) also introduces a third component potentially capable of crosslinking these structures. Axin is present at about 150 nM in HEK293T cells (Tan et al., 2012), which would predict no DAX oligomerization based on our estimated  $K_D$  for DAX-DAX association. However, the ability of other regions of Axin and APC to interact, as well as the effects of the crowded cellular environment, may enhance the effective DAX-DAX affinity. The amount of Axin in endogenous destruction complex puncta in *Drosophila* embryos is estimated to be in the 10's-100's of molecules (Schaefer et al., 2018). An *in vivo* analysis in which Axin was overexpressed approximately 4x indicated that DAX is not absolutely essential for destruction complex function (Peterson-Nedry et al., 2008); perhaps the multiple Axin-binding sites in APC, combined with the elevated concentration of Axin and the ability of  $\beta$ -catenin to bind both Axin and APC, provided sufficient crosslinking to enable destruction complex function in that case. Also,

overexpression of Axin or APC has little effect on  $\beta$ -catenin destruction in the absence of Wnt signal (Schaefer et al., 2018), which may indicate that the system is sufficiently efficient that increasing either component beyond normal level has no functional effect.

Although the DAX domain may not be absolutely necessary for destruction complex function *in vivo*, it is essential for turning off destruction (Peterson-Nedry et al., 2008), highlighting the importance of the Axin-Dvl interaction. The stronger DAX-DAX homotypic interaction compared to DIX-DAX may prevent disruption of the destruction complex by cytoplasmic Dvl in the absence of a Wnt signal. Dvl DIX oligomerization likely confers increased avidity on Dvl binding to Axin, which would be needed to overcome the stronger homotypic DAX-DAX interaction and thereby recruit the destruction complex to the activated receptors. Upon signaling, activation of Dvl results in the high-avidity binding of DAX to DIX needed to effectively recruit the destruction complex to the receptor complex and disrupt the function of the destruction complex (Fig. 8). Such a model explains the observation that substituting DAX for DIX in Dvl greatly enhances signaling (Fig. 6), as the higher self-affinity of Axin DAX would more readily recruit Axin to the receptor complex. Conversely, the loop insertion mutants that disrupt DIX oligomerization, and the inter-strand Dvl DIX mutants, which do not oligomerize to the same extent as wild-type DIX, may reduce signaling by lowering the effective avidity for Axin, although we cannot rule out that they directly impair the Axin-binding interface, particularly the loop insertions (Fig. 6). The observation that the Sm1 heptamer can rescue signaling in a non-oligomerizing Dvl2 mutant (Sm1-DAX<sub>Y760D</sub>-Dvl2), which can still form a single head-to-tail heterodimer with Axin, also supports the notion that avidity has an important role in recruiting Axin to the receptor complex. The equivalent fusion with DIX Y27D does not rescue, which can be attributed to the much weaker DIX-DAX interaction.

The limit of four Axin-binding sites per activated Dvl oligomer in a single receptor complex may provide an optimal stoichiometry for inhibition of GSK-3 (Fig. 8). The cellular concentrations of Axin and GSK-3 have been reported to lie in the tens–hundreds of nanomolar range (Tan et al., 2012). We have measured the affinity of GSK-3 and Axin to be  $K_D = 8$  nM (MDE and WIW, manuscript in preparation), implying that essentially all Axin brought to the activated receptor complex will be bound to GSK-3. A single phosphorylated LRP6 motif can inhibit GSK-3 with a  $K_i$  of 2  $\mu$ M (Stamos et al., 2014). Five inhibitory motifs in the LRP5/6 tail cooperate in Wnt/ $\beta$ -catenin signal transduction (MacDonald et al., 2008; Wolf et al., 2008), and it is not known how many GSK-3 molecules can be stably inhibited by one phosphorylated tail. Multiple motifs could be needed to ensure high rebinding probability of GSK-3 to achieve highly effective inhibition; alternatively, each motif could inhibit a GSK-3 molecule. In any case, there cannot be a great excess of GSK-3 relative to LRP5/6 for efficient inhibition of GSK-3. Therefore, a limited number of Axin/GSK-3 complexes associated with a single Fzd-LRP5/6 complex could maximize the GSK-3 inhibitory activity of an activated receptor complex.

The preceding analysis considered the relative stoichiometry of a single LRP5/6–Fzd/Dvl complex with Axin-GSK-3. However, multiple phosphorylated LRP5/6

molecules may be needed to stabilize enough  $\beta$ -catenin molecules to trigger target gene activation. It has been suggested that the activated “signalosome” is a crosslinked, perhaps phase separated, structure that would include multiple copies of the receptors (Gammons and Bienz, 2018; Schaefer and Peifer, 2019). The presence of <10 Dvl molecules in the puncta observed in our and other (Ma et al., 2020) TIRF experiments, and the binding of Axin DAX to the ends of Dvl DIX oligomers, indicates that there are likely to be roughly matched numbers of Axin and Dvl associated with the activated receptors. This would provide the appropriate relative stoichiometry to optimize crosslinking needed for a functional signalosome. It is important to note, however, that understanding the precise connection of the properties of the isolated DIX and DAX domains to the behavior of Dvl and Axin will require experiments using purified, full-length proteins. For example, both proteins have large unstructured regions and are also regulated by post-translational modifications, features that could contribute to phase separation behavior (Aberti et al., 2019; Feng et al., 2019; Owen and Shewmaker, 2019; Snead and Gladfelter, 2019). Moreover, it is possible that other regions of the Dvl protein affect the extent of DIX domain oligomerization, and likewise there may be intramolecular regulation of the Axin DAX domain (Kim et al., 2013). Finally, 10’s-100’s of Axin molecules were found in puncta present in Wnt stimulated *Drosophila* embryo cells when Axin was expressed at about 4x endogenous levels (Schaefer et al., 2018). The reason for the difference with our measurements is not clear, but it may indicate a significant concentration dependence of oligomerization, or perhaps that different regulatory mechanisms operate in the fly and mammalian systems. Moving forward, it will be essential to determine experimentally the relative numbers and regulatory states of receptors, Dvl and Axin in a signalosome.

## METHODS

| <b>Key Resources Table</b> |                       |                                       |                    |                                                                                     |
|----------------------------|-----------------------|---------------------------------------|--------------------|-------------------------------------------------------------------------------------|
| <b>Reagent type</b>        | <b>Designation</b>    | <b>Source or reference</b>            | <b>Identifiers</b> | <b>Additional information</b>                                                       |
| gene (mouse)               | Dvl2                  | This paper                            | GenBank U24160.2   | residues 2-736;<br>DIX= 12-92                                                       |
| gene (human)               | Axin1                 | This paper                            | NCBI NM_181050.3   | corresponds to residues 1-826 of NP_851393.1<br><br>DAX= 743-826<br>DI-DAX= 599-826 |
| gene (human)               | Tankyrase2 SAM domain | Nai-Wen Chi (Addgene plasmid # 34691) | NCBI NP_079511.1   | residues 867-940                                                                    |

|                                                       |                                |                                                                                                                                               |                                                                                                                                                                                                                                                                                                                  |                                                                                                |
|-------------------------------------------------------|--------------------------------|-----------------------------------------------------------------------------------------------------------------------------------------------|------------------------------------------------------------------------------------------------------------------------------------------------------------------------------------------------------------------------------------------------------------------------------------------------------------------|------------------------------------------------------------------------------------------------|
| gene (archaea)                                        | Sm1 heptamerization domain     | Integrated DNA Technologies                                                                                                                   | NCBI WP_010878376.1                                                                                                                                                                                                                                                                                              | residues 1-77                                                                                  |
| strain, strain background ( <i>Escherichia coli</i> ) | BL21 (DE3) Codon-Plus RIL      | Agilent                                                                                                                                       | 230245                                                                                                                                                                                                                                                                                                           | Strain for expressing recombinant proteins                                                     |
| strain, strain background ( <i>Escherichia coli</i> ) | XL10-Gold ultracompetent cells | Agilent                                                                                                                                       | 200314                                                                                                                                                                                                                                                                                                           | Strain used for molecular biology and creating recombinant DNA                                 |
| cell line ( <i>Homo-sapiens</i> )                     | Dvl TKO HEK293T                | Stephane Angers, University of Toronto<br>See Gammons et al 2016.<br>DOI: <a href="https://doi.org/10.1242/jcs.195685">10.1242/jcs.195685</a> | CRISPR/Cas9 deletion of hDvl1, hDvl2, and hDvl3                                                                                                                                                                                                                                                                  |                                                                                                |
| cell line ( <i>Homo-sapiens</i> )                     | Dvl2-GFP/dsRed-Axin1 HEK293T   | This paper; cells were derived from cells purchased from the European Collection of Cell Cultures                                             | C-terminal tagging by CRISPR/Cas9 gene editing<br><br><i>Authentication methods:</i> STR DNA profiling; flow cytometry and fluorescence microscopy using GFP/RFP; local genomic DNA sequencing; and anti-Dvl2 (Fig. S8) and anti-Axin1 immunoblots<br><br><i>Mycoplasma contamination testing status:</i> Tested |                                                                                                |
| cell line (mouse)                                     | L and L3A                      | ATCC                                                                                                                                          |                                                                                                                                                                                                                                                                                                                  | Used for generating Wnt-conditioned media                                                      |
| Recombinant DNA reagent                               | pCS2+                          | This paper                                                                                                                                    |                                                                                                                                                                                                                                                                                                                  | Ampicillin resistance; expression in mammalian cell culture; includes a N-terminal M2 Flag tag |
| Recombinant DNA reagent                               | pCDF-Duet-His6-MBP-TEV         | Novagen; modified in Weis lab to include MBP-TEV                                                                                              | 71340                                                                                                                                                                                                                                                                                                            | Streptomycin resistance; expression in bacterial cultures                                      |
| Recombinant DNA reagent                               | pGEX-TEV                       | Choi, Huber, and Weis, 2006<br>DOI:<br><a href="https://doi.org/10.1074/jbc.M511338200">10.1074/jbc.M511338200</a>                            |                                                                                                                                                                                                                                                                                                                  | pGEX-KG plasmid (ATCC) with a new TEV protease site                                            |

|                              |                                                                  |                             |          |                                                                       |
|------------------------------|------------------------------------------------------------------|-----------------------------|----------|-----------------------------------------------------------------------|
| Peptide, recombinant protein | MBP-Dvl2 DIX                                                     | This paper                  |          | DIX= 12-92                                                            |
| Peptide, recombinant protein | MBP-Axin1 DAX                                                    | This paper                  |          | DAX= 743-826                                                          |
| Peptide, recombinant protein | MBP-Axin1 DI-DAX                                                 | This paper                  |          | DI-DAX= 599-826                                                       |
| Peptide, recombinant protein | GST-Axin1 DI-DAX Y760D                                           | This paper                  |          | DI-DAX= 599-826                                                       |
| Chemical compound, drug      | Fetal Bovine Serum                                               | Gemini GemCell, U.S. Origin |          | Used to generating Wnt-conditioned media; provides low basal activity |
| Chemical compound, drug      | LB Broth, Miller, granules                                       | Fisher BioReagents          |          |                                                                       |
| Chemical compound, drug      | Amylose agarose                                                  | New England BioLabs         |          | Purify by MBP affinity                                                |
| Chemical compound, drug      | Glutathione agarose                                              | Pierce                      |          | Purify by GST affinity                                                |
| Chemical compound, drug      | Negative stain grids (carbon-coated copper)                      | EMS                         | CF200-Cu |                                                                       |
| Chemical compound, drug      | Cryo-EM lacey grids                                              | EMS                         | LC200-Cu | Freezing done with Leica EM GP                                        |
| Antibody                     | Dvl2 polyclonal antibody                                         | Cell Signaling Technology   | 3216     | IB (1:1000)<br>RRID:<br><a href="#">AB_2093338</a>                    |
| Antibody                     | Axin1 antibody                                                   | Cell Signaling Technology   | C76H11   |                                                                       |
| Antibody                     | Beta-catenin monoclonal antibody L54E2, AlexaFluor647-conjugated | Cell Signaling Technology   | 4627     | IF (1:300)<br>RRID:<br><a href="#">AB_10691326</a>                    |
| commercial assay or kit      | MALS                                                             | Wyatt                       |          | See main text for more details                                        |
| commercial assay or kit      | S75, S200, Superose 6 10/300                                     | Pharmacia/GE                |          | 24 mL columns are tolerant of high flow rates                         |



|                         |                                                                |                                                                                                                                                                                                                                                                                                                                                                            |           |                                                                       |
|-------------------------|----------------------------------------------------------------|----------------------------------------------------------------------------------------------------------------------------------------------------------------------------------------------------------------------------------------------------------------------------------------------------------------------------------------------------------------------------|-----------|-----------------------------------------------------------------------|
|                         |                                                                |                                                                                                                                                                                                                                                                                                                                                                            |           | "increase" grade                                                      |
| commercial assay or kit | TopFlash Dual-Light Reporter Gene Assay System                 | ThermoFisher/ Applied Biosystems                                                                                                                                                                                                                                                                                                                                           | T1005     |                                                                       |
| commercial assay or kit | AlexaFluor-488/647 C2 maleimide                                | ThermoFisher/ Molecular Probes                                                                                                                                                                                                                                                                                                                                             |           | See main text for more details                                        |
| commercial assay or kit | Phusion HiFi DNA polymerase                                    | Fermentas/Thermo Fisher                                                                                                                                                                                                                                                                                                                                                    |           |                                                                       |
| commercial assay or kit | FastDigest Restriction endonucleases                           | Fermentas/Thermo Fisher                                                                                                                                                                                                                                                                                                                                                    |           |                                                                       |
| commercial assay or kit | Gibson Assembly® HiFi 1-Step Kit                               | SIGMA DNA                                                                                                                                                                                                                                                                                                                                                                  | GA1100-10 |                                                                       |
| commercial assay or kit | Stain-free TGX                                                 | Biorad                                                                                                                                                                                                                                                                                                                                                                     |           | Specifically visualizes Trp-containing proteins, using Gel Doc EZ     |
| commercial assay or kit | Any Kd TGX                                                     | Biorad                                                                                                                                                                                                                                                                                                                                                                     | 4569036   | Used for native gel runs                                              |
| commercial assay or kit | LiCOR IR-dye secondary antibody and Odyssey 3.0 imaging system | LiCOR, Inc.                                                                                                                                                                                                                                                                                                                                                                |           | Used for visualizing immunoblots and quantifying sedimentation assays |
| Software, algorithm     | RELION 3.0.8                                                   | RRID:SCR_016274<br>He and Scheres, 2017 <a href="https://doi.org/10.1016/j.jsb.2017.02.003">https://doi.org/10.1016/j.jsb.2017.02.003</a><br>Scheres, 2012 <a href="https://doi.org/10.1016/j.jmb.2011.11.010">https://doi.org/10.1016/j.jmb.2011.11.010</a><br>Zivanov et al., 2018 <a href="https://doi.org/10.7554/eLife.42166">https://doi.org/10.7554/eLife.42166</a> |           |                                                                       |
| Software, algorithm     | CTFFIND-4.1                                                    | RRID:SCR_016732<br>Rohou and Grigorieff, 2015 <a href="https://doi.org/10.1016/j.jsb.2015.08.008">https://doi.org/10.1016/j.jsb.2015.08.008</a>                                                                                                                                                                                                                            |           |                                                                       |
| Software, algorithm     | Phenix                                                         | RRID:SCR_014224<br>Afonine et al., 2018 <a href="https://doi.org/10.1107/S2059798318006551">https://doi.org/10.1107/S2059798318006551</a>                                                                                                                                                                                                                                  |           |                                                                       |
| Software, algorithm     | Coot                                                           | RRID:SCR_014222<br>Emsley et al., 2010 <a href="https://doi.org/10.1107/S0907444910007493">https://doi.org/10.1107/S0907444910007493</a>                                                                                                                                                                                                                                   |           |                                                                       |
| Software, algorithm     | FIJI                                                           | RRID:SCR_002285<br>Schindelin et al., 2012 <a href="https://doi.org/10.1038/nmeth.2019">https://doi.org/10.1038/nmeth.2019</a>                                                                                                                                                                                                                                             |           |                                                                       |
| Software, algorithm     | Astra 6                                                        | RRID:SCR_016255, Wyatt Technologies                                                                                                                                                                                                                                                                                                                                        |           |                                                                       |

|                           |                      |                                                                                                          |                                |                  |
|---------------------------|----------------------|----------------------------------------------------------------------------------------------------------|--------------------------------|------------------|
| Software, algorithm       | GraphPad Prism 8.0.2 | GraphPad Software, Inc.                                                                                  | Version 263<br>RRID:SCR_002798 |                  |
| Software, algorithm       | u-track              | Jaqaman et al., 2008 <a href="https://doi.org/10.1038/nmeth.1237">https://doi.org/10.1038/nmeth.1237</a> |                                |                  |
| Software, algorithm       | Matlab               | The MathWorks, Inc.                                                                                      | Version 9.6.0.1072779 (R2019a) |                  |
| Software, algorithm       | BioRender            | ©BioRender - biorender.com                                                                               |                                | Used for Fig. 7a |
| Structure and cryo-EM map | Dvl2 DIX             | This paper                                                                                               | PDB: 6VCC; EMDB: 21148.        |                  |

### Expression constructs

Mouse Dishevelled2 (Dvl2; GenBank U24160.2; residues 2-736) and human Axin1 (NCBI NM\_181050.3; our gene corresponds to residues 1-826 of NP\_851393.1) genes were used to generate the constructs discussed below. His<sub>6</sub>-MBP-Dvl2 DIX (12-92), Axin1 DAX (743-826), and DI-DAX (Dimerization/Inhibitory-DAX; 599-826) proteins were cloned in a modified pCDF-Duet-His<sub>6</sub>-MBP-TEV vector with streptomycin resistance. DI-DAX Y760D construct was cloned in a modified pGEX-TEV vector with ampicillin resistance. Mammalian FLAG-Dvl2 constructs were cloned in pCS2+ M2-FLAG vector with ampicillin resistance. Human tankyrase 2 SAM domain (residues 867-940) was cloned from pFLAG-TNKS-2 (NCBI NP\_079511.1, 2-1166), which was a gift from Nai-Wen Chi (Addgene plasmid # 34691). The *Archaeoglobus fulgidus* (NCBI WP\_010878376.1 residues 1-77) Sm1 heptamerization sequence was synthesized as a codon-optimized mini-gene for human host cell expression (Integrated DNA Technologies, Coralville IA), which was used as a template for creating fusion proteins with Dvl2. Constructs were cloned using Gibson assembly (SGI DNA, LaJolla CA), overlap extension PCR, and restriction endonuclease digest/ligation (Fermentas, Waltham MA). Site-directed mutagenesis was primarily performed using PCR with primer pairs designed using Agilent QuickChange; parental templates were digested with DpnI (New England BioLabs). Primers for cloning and construct sequences are available upon request.

### Expression and purification of His<sub>6</sub>-MBP DIX, His<sub>6</sub>-MBP-DAX, GST-DI-DAX Y760D, and MBP-DI-DAX

His<sub>6</sub>-MBP-DIX variants, His<sub>6</sub>-MBP-DAX variants, and GST or His<sub>6</sub>-MBP-tagged DI-DAX variants were transformed into BL21(DE3) Codon-Plus RIL *Escherichia coli* (Agilent, Santa Clara CA). A single colony or a scraping from a glycerol stock was used to inoculate a starter culture. After 16 hours, the culture was expanded 1:100 up to 2L

cultures in Luria broth and induced at A600 ~0.60 with 0.5 mM isopropyl  $\beta$ -D-thiogalactopyranoside (GoldBio, St. Louis MO) for 24 h at 16°C. Cultures of MBP-tagged DIX or DAX in pCDF, and of GST-tagged DI-DAX in pGEX-TEV were grown in streptomycin (50  $\mu$ g/mL) + chloramphenicol (34  $\mu$ g/mL), and ampicillin (50  $\mu$ g/mL), respectively. Cultures were harvested by centrifugation at 6,000 x g for 15 min at 4°C. Harvested cell pellets were washed with ice cold 1x PBS and collected to be frozen with liquid nitrogen for storage at -80°C. Prior to lysis, for every 2L of culture, DNase I (12 units; MilliporeSigma D5025) supplemented with 10 mM MgCl<sub>2</sub> was added to cells resuspended in lysis buffer containing 20 mM Hepes pH 8.0, 150 mM NaCl, 5% glycerol, and 4 mM dithiothreitol (GoldBio). Lysis was performed using an Emulsiflex homogenizer (Avestin, Toronto ON) with two passes through ice water-chilled tubing at a target pressure of 15,000–20,000 psi. Clarified lysate was collected after 50,000 x g centrifugation for 30 min and batch-bound for 1 hr under gentle rotation onto a pre-equilibrated agarose column at 10 mL bed resin per 1L culture. The loaded column was then washed with the same lysis buffer supplemented with 1 mM EDTA and 500 mM NaCl under gravity flow and re-equilibrated. Amylose agarose (New England BioLabs, Ipswich MA) and glutathione agarose resin (Pierce, Waltham MA) were used for purifying MBP-tagged and GST-tagged proteins, respectively.

All purification steps were carried out at 4°C or on ice. All buffers for protein purification were prepared with deionized MilliQ water, chilled ice-cold, and supplemented with a protease inhibitor mixture (1 mM phenylmethylsulfonyl fluoride, 21  $\mu$ g/ml N-p-Tosyl-L-phenylalanine chloromethyl ketone, 42  $\mu$ g/ml N $\alpha$ -Tosyl-L-lysine chloromethyl ketone hydrochloride, 200  $\mu$ M benzamidin, 150 nM aprotinin, 1  $\mu$ M E-64, and 1  $\mu$ M leupeptin). At each stage of purification, fractions were analyzed by stain-free SDS-PAGE (Biorad, Hercules CA). Coomassie blue and Sypro stains were used in cases where the protein construct was tryptophan-free. Reported protein concentrations were measured by absorbance at 280 nm, BCA (ThermoFisher Scientific, Waltham MA), or Bradford (Biorad, Hercules CA) methods. All proteins were concentrated in Amicon Ultra centrifugal concentrators with regenerated cellulose membrane (MilliporeSigma).

### *Production of Soluble Non-Filamentous DIX Proteins*

MBP or GST fusion proteins bound to 10 mL of amylose or glutathione agarose beads suspended in 10 mL lysis buffer supplemented with 1 mM EDTA were cleaved with ~0.6 mg of TEV protease under gentle rotation overnight at 4°C. The eluate was collected, and the beads were further washed with 3 mL of lysis buffer. The combined eluate was filtered through a 0.2  $\mu$ m PES syringe filter and loaded onto a Superdex 75 26/600, which was run in lysis buffer with 1 mM EDTA. DAX and DI-DAX were concentrated to ~300  $\mu$ M and 100-200  $\mu$ M, respectively.

### *DIX Filament Production*

Following column re-equilibration after a high-salt wash, MBP-DIX proteins were eluted with three column volumes of lysis buffer containing 10 mM D-(+)-maltose monohydrate (Sigma) applied to loose resin under gentle rotation for 30 min. After draining the first elution, one more column volume of elution buffer was mixed with the resin bed for 5 minutes to complete the elution. The combined eluate could be concentrated up to 15 mg/mL. Yields for soluble His<sub>6</sub>-MBP-DIX range from 15-100 mg/L. For long-term storage at -80°C, the proteins were supplemented with 5% sucrose and subjected to flash-freezing with liquid nitrogen. For cleavage of His<sub>6</sub>-MBP tag to trigger filament formation, 0.5 mg/mL TEV protease was mixed with His<sub>6</sub>-MBP-DIX at 1:35 v:v and incubated at 4°C overnight. Filaments were further purified using size-exclusion chromatography with a Superose 6 Increase 10/300 GL gel filtration column in lysis buffer containing 1 mM EDTA. For samples intended for electron microscopy, glycerol was omitted. Quantitative analysis of purified filaments by band intensity on stain-free SDS-PAGE gels indicates that the purified filament fractions contain ~10% uncleaved His<sub>6</sub>-MBP-DIX. No electron density could be attributed to the MBP tag in the helical reconstruction.

### *Negative Stain Electron Microscopy*

Fresh samples from peak fractions following size-exclusion chromatography (3  $\mu$ L) were applied onto carbon-coated copper grids that had been glow discharged for 60s. Grids were negatively stained with 5  $\mu$ L of 0.75% w/v fresh uranyl formate for 30s. Images were acquired using a 200-keV Tecnai F20 microscope (Thermo Fisher Scientific) equipped with a Gatan K2 Summit direct electron detector (Gatan, Pleasanton CA).

### *Cryo-EM Sample Preparation and Data Acquisition*

Filament samples were taken from the peak fraction of each Superose 6 size exclusion chromatography run. Sample concentration was optimized for best imaging density at 120 ng/ $\mu$ L (Dvl2 DIX wildtype and E22Q/E24Q) and at 70 ng/ $\mu$ L (Axin1 DAX NQ/NG).

Freshly prepared filament samples (3  $\mu$ L) were applied to glow-discharged Lacey carbon film grids (LC200-Cu; Electron Microscopy Sciences, Hatfield PA). The grid was blotted for 2.0 s using Whatman #1 filter paper (GE Healthcare) at 95% humidity, and then plunge-frozen into liquid ethane using a Leica EM GP (Leica Microsystems).

The wildtype Dvl2 DIX sample was imaged on a Titan Krios electron microscope (Thermo Fisher Scientific) operated at 300 keV. Movie-mode micrographs were recorded at a nominal magnification of 29,000x using a K2 Summit direct electron detector (Gatan, Pleasanton CA) in counting mode, with a size of 1  $\text{\AA}$ /pixel and a dose rate of  $\sim 9.8 \text{ e}^-/\text{\AA}^2/\text{s}$ . The total exposure time was 10s, and each micrograph consisted of 50 frames. In total, 540 micrographs were manually collected with emphasis on medium-thickness ice. The images were motion corrected and dose weighted using MotionCor2 (Li et al., 2013) and Contrast Transfer Function (CTF) parameters were estimated by CTFFIND-4.1 (Rohou and Grigorieff, 2015).

The DIX QQ sample was imaged on a Tecnai F20 electron microscope. Movie-mode micrographs were recorded at a nominal magnification of 29,000 x using a K2 Summit direct electron detector in counted mode, with a pixel size of 1.286 Å/pixel on the specimen level and a dose rate of  $\sim 6.1 \text{ e}^-/\text{Å}^2/\text{s}$ . The total exposure time was 8s, and each micrograph had 40 frames. Motion correction and dose weighting were carried out as described for the WT DIX sample with the parameters given above. The

The DAX NQ/NG sample was imaged on a Titan Krios electron microscope (Thermo Fisher Scientific) operated at 300 keV. Movie-mode micrographs were recorded at a nominal magnification of 22,500x using a K3 Summit direct electron detector (Gatan, Pleasanton CA) in super-resolution mode, with a pixel size of 1.096 Å/pixel and a dose rate of  $\sim 16 \text{ e}^-/\text{Å}^2/\text{s}$ . The total exposure time was 2s, and each micrograph had 40 frames. Motion correction and dose weighting were carried out as described for the WT DIX sample with the parameters given above.

### *Cryo-EM Data Processing and molecular modeling*

Helical map reconstruction was performed with RELION 3.0.8 (He and Scheres, 2017; Scheres, 2012; Zivanov et al., 2018). Semi-automated particle picking on micrographs with defocus between 0.5 and 2.0  $\mu\text{m}$  and estimated maximum resolutions  $< 4 \text{ Å}$  yielded 437,872 particles. Successive rounds of reference-free 2D and 3D classification enabled us to select 110,105 particles from classes with well-defined features. The selected particles were subjected to 3D auto-refinement, Bayesian polishing and post-processing (map sharpening) to produce a final map with a global resolution estimate of 3.6 Å by the 0.143 Fourier shell correlation criterion (Rosenthal and Henderson, 2003) (Fig. S1d). The mask used for 3D refinement and sharpening was generated by extending a map 15 pixels from a preliminary model of all twelve subunits in Chimera (Pettersen et al., 2004). Using the “mask create” job type in RELION, the map was then lowpass filtered to 15 Å and the binarization threshold set to 0.06 before application of a binary edge of 1 pixel and a soft edge of 4 pixels. The final map was symmetrized according to the refined helical rise and twist after post-processing using the --impose option in the RELION\_helix\_toolbox. Local resolution (Fig. S1e) was calculated from the unsharpened map in RELION.

We used the crystal structure of Dvl2 Y27W/C80S (PDB 6IW3, with the Trp and Ser changed back to Tyr and Cys) to initially fit the cryo-EM map by rigid body refinement, and then used real space refinement in Phenix (Afonine et al., 2018) and manual model building in Coot (Emsley et al., 2010) to obtain the final structure (Table S1; Fig. S1f). Because the model was refined against the full map, its coordinates were first randomized with a mean error value of 0.2 Å. It was then refined against one half map, and Mtriage was then used to calculate the FSC between the model and each half map, as well as the full map (Fig. S1g).

Coordinates of the Dvl2 DIX filament have been deposited in the PDB, code 6VCC, and the cryo-EM map in the EMDB, code EMD-21148.

### *DIX filament sedimentation assays*

Purified Dvl2 DIX filament samples with or without Axin DAX were incubated at room temperature for 30 min, then centrifuged at 386,000 x g for 7 minutes at 4°C. After removal of the supernatant, the pellet was resuspended by vortexing in 1X SDS-PAGE sample buffer for 30 s. Pellet and supernatant fractions were then run on a 15% Tris-glycine-SDS gel containing 6M urea. The gel was stained with Coomassie blue and imaged on a LiCOR scanner (LICOR, Inc., Lincoln, NE), and band intensities determined in FIJI (Schindelin et al., 2012). Data from biological and technical replicates were analyzed in GraphPad PRISM 8. Error bars represent the standard error of the mean.

For filament formation assays, MBP-DIX at the indicated concentrations was incubated with 27 ng/μL TEV protease overnight at 4°C, and the samples were then pelleted as described above. Supernatant and pellet samples were run on a NuPage 4-12% Bis-Tris gel (ThermoFisher Scientific), which was visualized with Sypro Ruby stain (ThermoFisher Scientific, Waltham, MA) using a BioRad Gel Doc EZ Gel Imager (BioRad, Hercules, CA). Band intensities were quantified and plotted as described above.

### *Sizing of DAX and DIX domain variants on Superdex 75*

For the data in Fig. S3, 500 μL samples were injected onto a Superdex 75 10/300 column that was pre-equilibrated with 25 mM HEPES, pH 8.0, 150 mM NaCl, 2 mM DTT, 1 mM EDTA, and 5% glycerol. The samples were run at 0.5 mL/min. Runs showing multiple peaks were analyzed by SDS-PAGE, followed by Coomassie staining.

### *Multiangle light scattering*

The molecular weights of Dvl2 DIX, Axin1 DAX or DI-DAX samples (100 μL) prepared at different concentrations were determined by size exclusion chromatography coupled with inline multi-angle light scattering (MALS) using a Superose 6 10/300 (for Dvl2 DIX) or Superdex 200 10/300 GL (for DAX and DI-DAX) column attached to a UV detector, followed by a DAWN Heleos-II and an Optilab T-rEX refractive index (RI) detector (Wyatt Technology, Santa Barbara CA). The system was equilibrated with 25 mM HEPES, pH 8.0, 150 mM NaCl, 2 mM DTT, 1 mM EDTA, and 0.01% NaN<sub>3</sub> at 25 °C. 5% glycerol was included in experiments with Axin1 DAX, and 400 mM NaCl was used for DI-DAX. Detectors were calibrated by measuring the signal of monomeric bovine serum albumin at ~70 kDa. The absolute mass over the course of the run was determined with ASTRA 6 software (Wyatt Technology) using the signals from the MALS and the RI

detectors. Concentrations at the detector were determined from the maximum dRI of the peak.

### *Native protein gel electrophoresis of DIX-DAX mixed samples*

Purified DIX filament and DAX samples were mixed at the indicated concentrations for 30 minutes at room temperature. To each 15  $\mu$ L mix, 5x native loading buffer (250 mM Tris-HCl, pH 6.8, 50% glycerol, no loading dye) was added. Samples (14  $\mu$ L) were loaded into lanes where indicated of an Any kD Mini-PROTEAN TGX 15-well gel (#4569036, Biorad, Hercules CA). Electrophoresis was carried out in native Tris-glycine buffer (25 mM Tris, 190 mM glycine, pH~8.3) at 4°C at 25V for 12 hours followed by an additional 2 hours at 100V. DIX filaments labeled with AlexaFluor-488 C2 maleimide (with some residual dye left over from using a 2 mL 7,000 MWCO Zeba spin desalting column) were visualized using the SYBR Green setting of a Biorad Gel Doc EZ instrument with a 10s exposure. To confirm specific detection of DIX fluorescence, DAX samples were run on SDS-PAGE and were visualized using the same acquisition and image contrast settings. Both native- and SDS-PAGE gels were stained with Coomassie Blue for total protein.

### *Wnt signaling assays*

The activities of full-length Dvl constructs were tested using a Wnt-responsive TOPFlash luciferase reporter assay by transient expression in Dvl TKO HEK293T cells (generously provided by Stephane Angers, University of Toronto). Cells were seeded in a white opaque CulturPlate-96 (Perkin Elmer, Waltham MA) in DMEM containing 10% (v/v) FBS. After 6 hours, cells were transiently co-transfected with a SuperTOPFlash plasmid, as well as the indicated Dvl mutants, using Lipofectamine 2000 (Life Technologies) according to the manufacturer's protocol. The media were replaced with either conditioned media produced from mouse L cells (control) or from L cells expressing Wnt3a at 18 hours post-transfection, supplemented with 20 mM HEPES pH 8.0. After another 18 hours, Luciferase reporter luminescence was measured in a Synergy 2 plate reader (BioTek, Winooski VT). Activity assays for each Dvl construct were carried out at least three times, each with triplicate technical replicates. To report levels of Wnt-dependent Dvl2 signaling, each measurement in relative luciferase units was normalized to the level of wild type Dvl2 stimulated with Wnt3a conditioned L cell media. Dvl constructs were expressed at near endogenous levels, determined by using wildtype HEK293T cell lysate as a reference, blotted with anti-Dvl C terminus antibody (#3216, Cell Signaling, Danvers MA) and measuring the intensity of the Dvl band determined using a LICOR scanner (LICOR, Inc., Lincoln, NE) (see Fig. S2). Data from biological and technical replicates were analyzed in GraphPad PRISM 8. Error bars represent the standard error of the mean.

## *CRISPR/Cas9 mediated endogenous tagging of Dvl2 and Axin1*

Endogenously tagged HEK293T cells were generated essentially as described (Sakuma et al., 2015). In brief, DVL2 and subsequently Axin1 were C-terminally tagged at their endogenous loci using CRISPR/Cas9 gene editing and micro-mediated homologous end joining (MMEJ) to introduce GFP-T2A-PURO and RFP-T2A-HYGRO, respectively. The CRISPR guide design tool *crispr.mit.edu* was used to design targeting guides (DVL2 – CAATCCCAGCGAGTTCTTTG; Axin1 – CATCGGCAAAGTGGAGAAGG), which were cloned into pX330A-1x2 (Addgene #58766) and combined with pX330A-2-PITCh (Addgene #63670) by golden gate cloning. To generate the DVL2 repair construct, DVL2 micro-homology arms were cloned into pCRIS-PITChv2 (Addgene #63672) either side of GFP-T2A-PURO. To generate the Axin1 repair construct Axin1 micro-homology arms and T2A sequences were incorporated into overlapping primers used to amplify RFP from ds-RED-N1 and HYGRO from pcDNA5/FRT/TO and assembled into pCRIS-PITChv2 by Gibson Assembly.

HEK293T cells (50-60% confluence) were transfected with pX330A/PITCh and pCRIS-PITChv2 (2:1) using PEI, the media was changed the next day, and selection was started 72 hours post-transfection (1 $\mu$ g/ml puromycin or 100 $\mu$ g/ml hygromycin) for 7 days. After recovery, GFP/RFP positive cells were sorted into individual clones by flow cytometry. Clones were analyzed by local genomic DNA sequencing and expression was confirmed by western blot analysis using anti-DVL2 (CST #3216) and anti-Axin1 (CST #C76H11) antibodies.

## *TIRF microscope*

Total internal reflection fluorescence (TIRF) microscopy was done with an inverted microscope (Nikon TiE) using an Apo TIRF x100 oil, NA 1.49, objective lens (Nikon) and was controlled through Micromanager (Edelstein et al., 2014). Experiments were conducted at room temperature for the *in vitro* filament assays and using an objective heater (Biotech) set at 37 °C for the live cell experiments. The microscope was equipped with a Perfect Focus System. A red laser (635 nm, Blue Sky Research) and a blue laser (473 nm Obis, Coherent) were used for Alexa Fluor 647 and GFP excitation respectively. Emitted light went through a quad-edge laser-flat dichroic with center/bandwidths of 405 nm/60 nm, 488 nm/100 nm, 532 nm/100 nm, and S5 635 nm/100 nm from Semrock (Di01-R405/488/532/635-25x36) and a corresponding quad-pass filter with center/bandwidths of 446 nm/37 nm, 510 nm/20 nm, 581 nm/70 nm, 703 nm/88 nm bandpass filter (FF01- 446/510/581/703-25). An additional filter cube (679 nm/41 nm, 700 nm/75 nm for Alexa Fluor 647 imaging; 470 nm/40 nm, 495 nm LP, 525 nm/50 nm for GFP imaging) was included before the camera in the light path. All analyzed images were taken at 100ms exposure time using the full chip of a Hamamatsu Orca Flash 4.0 camera (chip size 2048 x 2048 pixels). The average background in different ~20  $\mu$ m boxes varied ~10% over the field of view.



### *TIRF imaging of purified DIX filament severing by DAX*

For fluorescent labeling of DIX at Cys80 (the only Cys in the MBP-DIX construct), 500  $\mu$ L of His<sub>6</sub>-MBP-DIX at  $\sim$ 10 mg/mL was desalted into buffer containing 50 mM HEPES, pH8.0, 150 mM NaCl, 1 mM EDTA, and 4 mM TCEP using a 2 mL 7,000 MWCO Zeba spin desalting column (ThermoFisher Scientific, Waltham MA). The desalted protein was incubated with 40  $\mu$ L of 10 mM AlexaFluor-647 C<sub>2</sub> maleimide (ThermoFisher Scientific, Waltham MA) (stock dissolved in DMSO) overnight at 4°C. The reaction was quenched by the addition of DTT to a final concentration of 10 mM, and the protein was cleaved for one hour at room temperature by adding 0.5 mg/mL TEV protease at 1:35 v/v. Labeled filaments were further purified using size-exclusion chromatography with a Superose 6 Increase 10/300 GL gel filtration column in lysis buffer containing 1 mM EDTA. Functionality of labeled DIX filaments was verified by negative stain EM, resistance to serial dilution and DAX solubilization assays (data not shown). Dye coupling efficiency to DIX Cys80 was >50% based on the relative extinction coefficients of the protein and dye.

A total of four replicate imaging experiments were performed, two per day, using two separate preparations of DIX filaments and a single DAX preparation. For each experiment, Alexa 647 labeled DIX filaments were incubated with (experimental) or without (control) DAX at room temperature for  $\sim$ 1 hour (sample 1) or  $\sim$ 1.30-2 hours (sample 2) before the start of imaging. Samples were placed in 35 mm glass bottom dishes with 14 mm micro-wells (#1.5 cover glass) from Cellvis. Each micro-well was prepared by first washing with DIX gel filtration buffer ("DIX buffer") at least 3 times, then filled with 100  $\mu$ l DIX buffer. A 1  $\mu$ l sample containing 10  $\mu$ M DIX with or without 50  $\mu$ M DAX was diluted 1:100 with DIX buffer and immediately added to the micro-well for a final dilution of 1:200. After a 30-second incubation, the micro-well was washed at least 6 times by two-fold dilution with buffer to wash away free proteins in solution and left in 100  $\mu$ l buffer before placing the micro-well on the microscope. Imaging started 1-5 minutes after washing and was completed within 1-5 minutes. Most of the images were taken by walking the stage diagonally across from one corner of the coverslip to the other, avoiding regions that had been previously bleached. For replicate 1, we imaged the control before the experimental sample and did the reverse for replicate 2. Imaging was performed at laser powers out of the objective of 0.44 mW (day 1) and 5.1 mW (day 2). The results from the two days were similar, so we concluded the data are not strongly dependent on laser power over this range.

Images were processed in FIJI (Schindelin et al., 2012). Each pair within a replicate had 18 to 63 image frames. The mean gray values MGVs of each frame were recorded. We compared the distribution of MGVs using the Mann-Whitney U test, which gave  $p < 0.05$  for each replicate. A bootstrapping test was run to reject the null hypothesis that the means were not different. We resampled data points for each condition within a pair and recorded the difference of means 5000 times. The

distribution for each replicate indicated a positive difference of means (experimental case with higher background) for the middle 95% of each replicate.

We recorded the ratio of the means for each replicate. We used bootstrapping (resampling 5000 times) to get a distribution for the means that was fit to a Gaussian. The standard deviation of each mean was propagated to produce error values for each ratio of means. The 4 values of the ratio of means were then averaged to get the mean ratio of means with errors from the previous step propagated.

### *Immunofluorescent staining for $\beta$ -catenin accumulation*

Dvl2-GFP/dsRed-Axin1 HEK293 cells were seeded at ~60% confluence in Lab-Tek chamber slides (Nunc 177380) that were pre-coated with 0.1 mg/mL poly-D-lysine (Sigma P6407). The following day, the cells were washed with Hanks' balanced salt solution (HBSS) (Gibco 24020117) and then treated at 37°C with L cell control or Wnt3A-containing conditioned media for 2 hours. At the end of treatment, cells at room temperature were fixed for 10 minutes with 2% formaldehyde (Electron Microscopy Sciences 15710), and permeabilized for one hour with 0.1% Triton X-100 (Biorad 1610407) supplemented with 1% BSA (Sigma). Cells were then stained overnight at 4°C with AlexaFluor 647-conjugated anti- $\beta$ -catenin antibody L54E2 at 1:300 dilution supplemented with 3% BSA (2677S, Cell Signaling). Between and after each of these steps, cells were washed three times with HBSS, which was also used to make up each reagent. Sample mounting was achieved using ProLong glass antifade mountant with NucBlue (Invitrogen P36983), and each chamber was sealed with a glass coverslip. Cell epifluorescence was imaged at 60x and AlexaFluor647 was detected on the Cy5 channel. For every condition, 5-7 fields of view, each with ~100 cells, were acquired under the same exposure. Mean gray values (MGVs) at the center of each frame were measured and tallied per condition for comparison as shown in Figure 6b.

### *Cell culture for live cell imaging*

For the short-term epifluorescent live cell imaging and the apical single molecule localization microscopy assay, HEK293T Dvl2-GFP/Axin1-RFP cells were passaged no more than 2 times after expansion, incubated in sterile-filtered DMEM media containing phenol red (15 mg/L), high glucose (4500 mg/L), L-glutamine (584mg/L) (Thermo Fisher Scientific, 11965092), with added 10% FBS, Sodium Pyruvate (110 mg/L), and 1% penicillin–streptomycin (Thermo Fisher Scientific, 15140122). Cells were passaged through splitting by cell dissociation using 0.25% Trypsin-EDTA (Life Technologies, 25200056) and subculturing. L control conditioned media, and L Wnt3A-conditioned media are described previously in section Wnt signaling assays. For the long-term epifluorescent live cell imaging, the cells were passaged 3 to 4 times in DMEM based media with same supplements as above but with HEPES based CO<sub>2</sub>-independent buffering (5958 mg/L) (Thermo Fisher Scientific, 21063045) instead of phenol red.

### *Epifluorescence microscope*

An inverted Nikon Ti-E microscope was controlled using Micromanager (Edelstein et al., 2014). The microscope was connected to a pre-equilibrated heating chamber set to 37 °C and equipped with a Perfect Focus System, a Heliophor light engine (89 North) and an Andor sCMOS Neo camera. We utilized 2 objective lenses: a CFI Plan Apo Lambda x40 0.95 air objective lens; and a CFI Plan Apo Lambda x60 1.40 air objective lens. Acquisitions were performed on GFP and Cy5 channels as appropriate.

### *Live cell epifluorescence imaging*

For short term imaging, we seeded cells overnight onto 2 wells with passaging media (DMEM with 10% FBS) and 2 wells with L control conditioned media in a 24-well glass bottom plate (FisherScientific NC0397150). Before imaging, we changed one well each from the passaging or L control media into L Wnt3A-conditioned media. Multiple regions of the Wnt-stimulated cells were imaged at 60x magnification at 10-20 minutes and 40-50 minutes. We also imaged multiple regions of the control cells at the start and end of the experiment. All analyzed fluorescence images were acquired with 300 ms exposures.

For long term epifluorescence imaging (Supplemental video 1), cells were seeded overnight in a 24-well glass bottom plate (FisherScientific NC0397150). We recorded coordinates of multiple regions within and across wells and sequentially acquired images from all the regions every ~3 minutes for ~16 hours at 40x magnification.

The collection of the mean grey values (MGVs) in the center (1000-by-1000 pixels) of each frame in the  $\pm$ Wnt conditions were significantly different as assessed by the Mann-Whitney U test ( $p < 0.05$ ). A bootstrap test was run to reject the null hypothesis that the means were not different where the collection of points were resampled at the sample size and difference of means calculated for 500 runs. The middle 95% of the resulting mean difference distribution was positive indicating a significant rise in  $\beta$ -catenin levels.

### *Apical TIRF live cell imaging for Dvl2-GFP tracking and intensity analysis*

All experiments were conducted using an objective heater (Bioptechs) equilibrated at 37 °C and all media used at all stages were also equilibrated at 37 °C. Two sets of experiments were run. In the first set, cells were imaged before and after stimulation with Wnt3A conditioned media, whereas the second set were replicates

using only Wnt3A stimulated cells. In the first set, cells were seeded overnight in passaging media on the outer facing part of the filter of transwell inserts (12 mm Transwell®, 0.4 µm Pore Polyester Membrane Insert, Corning, 3460). The transwells were kept inverted in 6-well flat bottom plates to ensure cell settling (Corning CoStar, 3506) and incubated in ~200 µL media for 1-2 days. The empty wells were filled with media for humidity. Whenever needed, the 6-well plate lid was placed and removed with care to avoid perturbing the media sandwiched between the lid and the transwell tops. Before imaging, a 35 mm glass bottom dish with 20 mm micro-well (#1.5 cover glass) (Cellvis, D35-20-1.5-N) was equilibrated at 37 °C with 1.5 ml passaging media. The transwell in the experiment was inverted gently using tweezers into a 12-well flat bottom plate (Corning CoStar, 3512) which was to be used as a stable carrier for transfer to imaging room, with cells apical side down inside ~0.5 ml passaging media. Immediately after inversion, 1 ml passaging media was added to the inside of the transwell filters. A custom designed 3D printed holder allowed stable placement of the glass bottom dish on the microscope. After removal of the lids of the plate and the glass bottom dish, the transwell insert was quickly and gently transferred with sterile tweezers onto the micro-well, with cells still apical side down. The perfect focus system would not always work as desired with the transwell insert above the glass, and it was sometimes necessary to find the correct plane before placement of the insert onto the micro-well. Imaging commenced immediately following placement of the transwell insert. After imaging a number of regions, the transwell insert was gently lifted, the micro-well was spiked with 0.5 ml L Wnt3A-conditioned media equilibrated at 37 °C, and the transwell insert was gently positioned back. Imaging continued for up to ~70 minutes.

In each of the five experimental pools, 4-11 analyzed fields of view with multiple cells were imaged, each for about fifty to a few hundred frames. We used multiple configurations: a) 2-3 different TIRF angles, b) focus centered as close to the coverslip as possible or slightly above (~200nm), c) at 2 different blue laser powers (3 mW and ~5mW out of the objective). Regions were not necessarily illuminated by the strongest part of the TIRF field due to separation from the cover glass, yet we were still able to image at high signal-to-noise ratio.

During this first set of experiments, we noticed that lifting the PET filter and flowing in Wnt3A-conditioned media into the microwell occasionally caused cell blebbing. We also sought to investigate the case where both sides of the cells were exposed to Wnt3A-conditioned media. Thus, the protocol was slightly altered for the second set of experiments. We seeded the cells on transwell inserts into media conditioned by control L cells instead of the passaging media. Before imaging, the glass bottom dish was filled with 1.5 ml L cell Wnt3A-conditioned media, and the inside of the transwell was also filled in with 1 ml L cell Wnt3A-conditioned media while in the 12-well carrier plate, with the time of first Wnt3A exposure noted. Within ~2 minutes, the transwell insert was gently placed on to the micro-well (filled with L cell Wnt3A-conditioned media), and then imaged.

We pooled data from videos according to the following criteria: The first 40 frames (100ms exposure per frame) were pooled when belonging to movies recorded

the same day, with the same laser power and approximate TIRF angle and condition (with or without L cell Wnt3A-conditioned media treatment). This produced 2 pools of data without and 3 pools with L cell Wnt3A-conditioned media treatment. When analyzing data from L cell Wnt3A-conditioned media-treated cells, we pooled all videos starting at 9 minutes after the addition of L cell Wnt3A-conditioned media.

The 40 frames for each region in a given pool were processed in Fiji (Schindelin et al., 2012) to apply a rolling ball background filter (5 pixel/325 nm diameter). We cropped out large empty regions where there were no cells in the TIRF field. We then used u-track (Jaqaman et al., 2008) in Matlab in order to extract single particle trajectories. We optimized the detection and tracking parameters and confirmed reasonable tracking by eye. Specifically, for detection, we chose the single particle detection with Gaussian mixture model fitting option with a Gaussian standard deviation 1 pixel. We selected rolling window time-averaging of window size 5 and an alpha-value of 0.05 for comparison with local background. For tracking, the maximum gap to close was set to 4 frames.

The output from u-track was analyzed using custom Matlab code. For each pool, we extracted spot trajectories 10 frames or longer which was helpful in getting rid of the background from the media while keeping most of the true positives. We recorded the intensity at the starting frame of those trajectories. Theoretically, for the subpopulation of spots with  $n$  fluorophores, the background subtracted intensity distribution will be a single Gaussian, peaking roughly at  $n$  times the mean intensity of a single fluorophore. Thus, the intensity distribution from the ensemble of spots was fit to a Gaussian mixture model for 1 through  $N$  components using the built-in “fitgmdist” function with 100 replicates and a maximum of 500 iterations, and the number of components minimizing Bayesian Information Criterion (BIC) or Akaike Information Criterion (AIC) was selected.  $N$ , the largest number of possible components tested for a given pool, was always set larger than the number of components eventually found to provide the best fit (all cases with BIC and some with AIC), or alternatively one less than the number of components that frequently resulted in ill-conditioned covariances in every replicate of a run (as sometimes occurred with AIC). While the criteria resulted in fits different in the number of mixture components and their means, they gave similar final normalized distributions (see below), with 90% of the spot intensities being within 10x of a single GFP intensity in both cases. The plot in Figure 6c utilizes BIC for model selection.

Due to the observed cell-to-cell heterogeneity in the HEK293T Dvl2-GFP/Axin1-RFP cell line, the limitations of the GFP tag, and the possibility of the Dvl2 complex size having a highly skewed distribution, we did not focus on the proportions of different mixture components which would map to different proportions of complex sizes. Instead, we treated the difference of the 2 smallest mixture component means from the fit as the single GFP mean intensity value, subtracted the background value this implied from its difference from the minimum mixture component mean, and then normalized the intensity axis accordingly (Fig 6c). The single GFP value for each pool was always smaller (within ~2 fold in the BIC case) than the smallest mixture component mean, which we attribute to imperfect background subtraction, and bleaching within camera

exposures. We note that we expect a typical maturation efficiency of 90% for eGFP (Cormack et al., 1996) to affect our estimations for numbers of molecules by ~10%.

Fluorescence images, FIJI macros and Matlab code are available upon request.

## Acknowledgements

We thank Stephane Angers for providing the HEK293T Dvl TKO cells; David Bushnell, Elizabeth Montabana, Qianhui Qu, Alpays Seven and Min Su for assistance and advice in the EM analysis; Sabine Pokutta for advice on the sedimentation assays; and Jake Mahoney for discussions and comments on the manuscript. This work was supported by U.S. National Institutes of Health grants GM119156 (W.I.W.), GM130332 (A.R.D), and T32 GM007276 (M.D.E.); a Pew Scholars Innovation Award (W.I.W. & G.S.); a Stanford Bio-X Graduate Fellowship (E.K.); a Fritz Thyssen Foundation fellowship (S.M.); a Faculty Scholar Award from the Howard Hughes Medical Institute (A.R.D); and the Medical Research Council (MC\_U105192713 to M.B.) and Cancer Research UK (C7379/A15291 to M.B.).

## References

- Aberti, S., Gladfelter, A., and Mittag, T. (2019). Considerations and challenges in studying liquid-liquid phase separation and biomolecular condensates. *Cell* *176*, 419-434.
- Afonine, P.V., Poon, B.K., Read, R.J., Sobolev, O.V., Terwilliger, T.C., Urzhumtsev, A., and Adams, P.D. (2018). Real-space refinement in *PHENIX* for cryo-EM and crystallography. *Acta Crystallogr D* *74*, 531-544.
- Banani, S.F., Rice, A.M., Peeples, W.B., Lin, Y., Jain, S., Parker, R., and Rosen, M.K. (2016). Compositional control of phase-separated cellular bodies. *Cell* *166*, 651-663.
- Behrens, J., Jerchow, B.-A., Würtele, M., Grimm, J., Asbrand, C., Wirtz, R., Kühl, M., Wedlich, D., and Birchmeier, W. (1998). Functional interaction of an Axin homolog, conductin, with  $\beta$ -catenin, APC, and GSK3b. *Science* *280*, 596-599.
- Bienz, M. (2014). Signalosome assembly by domains undergoing dynamic head-to-tail polymerization. *Trends Biochem Sci* *39*, 487-495.
- Cadigan, K., and Waterman, M.L. (2012). TCF/LEFs and Wnt signaling in the nucleus. *Cold Spring Harb Perspect Biol* *4*, a007906.

- Clevers, H., and Nusse, R. (2012). Wnt/ $\beta$ -catenin signaling and disease. *Cell* *149*, 1192-1205.
- Cliffe, A., Hamada, F., and Bienz, M. (2003). A role of Dishevelled in relocating Axin to the plasma membrane during wingless signaling. *Curr Biol* *13*, 960-966.
- Cormack, B.P., Valdivia, R.H., and Falkow, S. (1996). FACS-optimized mutants of the green fluorescent protein (GFP). *Gene* *173*, 33-38.
- Edelstein, A.D., Tsuchida, M.A., Amodaj, N., Pinkard, H., Vale, R.D., and Stuurman, N. (2014). Advanced methods of microscope control using uManager software. *J Biol Methods* *1*, e10.
- Emsley, P., Lohkamp, B., Scott, W.G., and Cowtan, K. (2010). Features and development of Coot. *Acta Crystallogr D Biol Crystallogr* *66*, 486-501.
- Feng, Z., Chen, X., Wu, X., and Zhang, M. (2019). Formation of biological condensates via phase separation: characteristics, analytical methods, and physiological implications. *J Biol Chem* *294*, 14823-14835.
- Fiedler, M., Mendoza-Topaz, C., Rutherford, T.J., Mieszczanek, J., and Bienz, M. (2011). Dishevelled interacts with the DIX domain polymerization interface of Axin to interfere with its function in down-regulating  $\beta$ -catenin. *Proc Natl Acad Sci U S A* *108*, 1937-1942.
- Gammons, M.V., and Bienz, M. (2018). Multiprotein complexes governing Wnt signal transduction. *Curr Opin Cell Biol* *51*, 42-49.
- Gammons, M.V., Renko, M., Johnson, C.M., Rutherford, T.J., and Bienz, M. (2016a). Wnt signalosome assembly by DEP domain swapping of dishevelled. *Mol Cell* *64*, 92-104.
- Gammons, M.V., Rutherford, T.J., Steinhart, Z., Angers, S., and Bienz, M. (2016b). Essential role of the dishevelled DEP domain in a Wnt-dependent human-cell-based complementation assay. *J Cell Sci* *129*, 3892-3902.
- Ha, N.-C., Tonzuka, T., Stamos, J.L., Choi, H.-J., and Weis, W.I. (2004). Mechanism of phosphorylation-dependent binding of APC to  $\beta$ -catenin and its role in  $\beta$ -catenin degradation. *Mol Cell* *15*, 511-521.
- Hart, M.J., de los Santos, R., Albert, I.N., Rubinfeld, B., and Polakis, P. (1998). Downregulation of  $\beta$ -catenin by human Axin and its association with the APC tumor suppressor,  $\beta$ -catenin, and GSK3 $\beta$ . *Curr Biol* *8*, 573-581.
- He, S., and Scheres, S.H.W. (2017). Helical reconstruction in RELION. *Journal of structural biology* *198*, 163-176.
- Ikeda, S., Kishida, S., Yamamoto, H., Murai, H., Koyama, S., and Kikuchi, A. (1998). Axin, a negative regulator of the Wnt signaling pathway, forms a complex with GSK-3 $\beta$  and  $\beta$ -catenin and promotes GSK-3 $\beta$ -dependent phosphorylation of  $\beta$ -catenin. *EMBO J* *17*, 1371-1384.

Jaqaman, K., Loerke, D., Mettlen, M., Kuwata, H., Grinstein, S., Schmid, S.L., and Danuser, G. (2008). Robust single-particle tracking in live-cell time-lapse sequences. *Nature Methods* 5, 695-702.

Jaykumar, A.B., Caceres, P.S., Sablaban, I., Tannous, B.A., and Ortiz, P.A. (2016). Real-time monitoring of NKCC2 endocytosis by total internal reflection fluorescence (TIRF) microscopy. *Am J Physiol Renal Physiol* 310, F183-F191.

Julius, M.A., Schelbert, B., Hus, W., Fitzpatrick, E., Jho, E., Fagotto, F., Costantini, F., and Kitajewski, J. (2000). Domains of Axin and Dishevelled required for interaction and function in Wnt signaling. *Biochem Biophys Res Commun* 276, 1162-1169.

Kearse, M., Moir, R., Wilson, A., Stones-Havas, S., Cheung, M., Sturrock, S., Buxton, S., Cooper, A., Markowitz, S., Duran, C., *et al.* (2012). Geneious Basic: an integrated and extendable desktop software platform for the organization and analysis of sequence data. *Bioinformatics* 28, 1647-1649.

Kim, S.E., Huang, H., Zhao, M., Zhang, X., Zhang, A., Semonov, M.V., MacDonald, B.T., Garcia Abreu, J., Peng, L., and He, X. (2013). Wnt stabilization of  $\beta$ -catenin reveals principles for morphogen receptor-scaffold assemblies. *Science* 340, 867-870.

Kishida, S., Yamamoto, H., Hino, S., Ikeda, S., Kishida, M., and Kikuchi, A. (1999). DIX domains of Dvl and Axin are necessary for protein interactions and their ability to regulate  $\beta$ -catenin stability. *Mol Cell Biol* 19, 4414-4422.

Kunttas-Tatli, E., Roberts, D.M., and McCartney, B.M. (2014). Self-association of the APC tumor suppressor is required for the assembly, stability, and activity of the Wnt signaling destruction complex. *Mol Biol Cell* 25, 3424-3436.

Li, X., Mooney, P., Zheng, S., Booth, C.R., Braunfeld, M.B., Gubbens, S., Agard, D.A., and Cheng, Y. (2013). Electron counting and beam-induced motion correction enable near-atomic-resolution single-particle cryo-EM. *Nat Methods* 10, 584-590.

Liu, Y.T., Dan, Q.J., Wang, J., Feng, Y., Chen, L., Liang, J., Li, Q., Lin, S.C., Wang, Z.X., and Wu, J.W. (2011). Molecular basis of Wnt activation via the DIX domain protein Ccd1. *J Biol Chem* 286, 8597-8608.

Luo, W., Zou, H., Jin, L., Lin, S.C., Li, Q., Ye, Z., Rui, H., and Lin, S.C. (2005). Axin contains three separable domains that confer intramolecular, homodimeric, and heterodimeric interactions involved in distinct functions. *J Biol Chem* 280, 5054-5060.

Ma, W., Chen, M., Kang, H., Steinhart, Z., Angers, S., He, X., and Kirschner, M.W. (2020). Single molecule dynamics of Dishevelled at the plasma membrane and Wnt pathway activation. *bioRxiv*, doi:<http://dx.doi.org/10.1101/624882>.

MacDonald, B.T., and He, X. (2012). Frizzled and LRP5/6 receptors for Wnt/ $\beta$ -catenin signaling. *Cold Spring Harb Perspect Biol* 4, a007880.

MacDonald, B.T., Tamai, K., and He, X. (2009). Wnt/ $\beta$ -catenin signaling: components, mechanisms, and diseases. *Dev Cell* 17, 9-26.



MacDonald, B.T., Yokota, C., Tamai, K., Zeng, X., and He, X. (2008). Wnt signal amplification via activity, cooperativity, and regulation of multiple intracellular PPPSP motifs in the Wnt co-receptor LRP6. *J Biol Chem* 283, 16115-16123.

Madeira, F., Park, Y.M., Lee, J., Buso, N., Gur, T., Madhusoodanan, N., Basutkar, P., Tivey, A.R.N., Potter, S.C., Finn, R.D., *et al.* (2019). The EMBL-EBI search and sequence analysis tools APIs in 2019. *Nucleic acids research* 47, W636-W641.

Madrzak, J., Fiedler, M., Johnson, C.M., Ewan, R., Knebel, A., Bienz, M., and Chin, J.W. (2015). Ubiquitination of the Dishevelled DIX domain blocks its head-to-tail polymerization. *Nature communications* 6, 6178.

Mariotti, L., Templeton, C.M., Ranes, M., Paracuellos, P., Cronin, N., Beuron, F., Morris, E., and Guettler, S. (2016). Tankyrase requires SAM domain-dependent polymerization to support Wnt- $\beta$ -catenin signaling. *Mol Cell* 63, 498-513.

Mendoza-Topaz, C., Mieszczanek, J., and Bienz, M. (2011). The adenomatous polyposis coli tumour suppressor is essential for Axin complex assembly and function and opposes Axin's interaction with Dishevelled. *Open Biol* 1, 110013.

Molenaar, M., van de Wetering, M., Oosterwegel, M., Peterson-Maduro, J., Godsave, S., Korinek, V., Roose, J., Destree, O., and Clevers, H. (1996). XTcf-3 transcription factor mediates  $\beta$ -catenin-induced axis formation in *Xenopus* embryos. *Cell* 86, 391-399.

Nusse, R., and Clevers, H. (2017). Wnt/ $\beta$ -catenin signaling, disease, and emerging therapeutic modalities. *Cell* 169, 985-999.

Owen, I., and Shewmaker, F. (2019). The role of post-translational modifications in the phase transitions of intrinsically disordered proteins. *Int J Mol Sci* 20, 5501.

Peterson-Nedry, W., Erdeniz, N., Kremer, S., Yu, J., Baig-Lewis, S., and Wehrli, M. (2008). Unexpectedly robust assembly of the Axin destruction complex regulates Wnt/Wg signaling in *Drosophila* as revealed by analysis *in vivo*. *Dev Biol* 320, 226-241.

Pettersen, E.F., Goddard, T.D., Huang, C.C., Couch, G.S., Greenblatt, D.M., Meng, E.C., and Ferrin, T.E. (2004). UCSF Chimera – a visualization system for exploratory research and analysis. *J Comput Chem* 25, 1605-1612.

Pronobis, M.I., Deutch, N., Posham, V., Mimori-Kiyosue, Y., and Peifer, M. (2017). Reconstituting regulation of the canonical Wnt pathway by engineering a minimal  $\beta$ -catenin destruction machine. *Mol Biol Cell* 28, 41-53.

Rohou, A., and Grigorieff, N. (2015). CTFFIND4: fast and accurate defocus estimation from electron micrographs. *Journal of structural biology* 192, 216-221.

Rosenthal, P.B., and Henderson, R. (2003). Optimal determination of particle orientation, absolute hand, and contrast loss in single-particle electron cryomicroscopy. *J Mol Biol* 333, 721-745.

Sakuma, T., Takenaga, M., Kawabe, Y., Nakamura, T., Kamihira, M., and Yamamoto, T. (2015). Homologous recombination-independent large gene cassette knock-in in

CHO cells using TALEN and MMEJ-directed donor plasmids. *Int J Mol Sci* *16*, 23849-23866.

Schaefer, K.N., Bonello, T.T., Zhang, S., Williams, C.E., Roberts, D.M., McKay, D.J., and Peifer, M. (2018). Supramolecular assembly of the beta-catenin destruction complex and the effect of Wnt signaling on its localization, molecular size, and activity in vivo. *PLoS Genet* *14*, e1007339.

Schaefer, K.N., and Peifer, M. (2019). Wnt/beta-catenin signaling regulation and a role for biomolecular condensates. *Dev Cell* *48*, 429-444.

Schaefer, K.N., Pronobis, M., Williams, C.E., Zhang, S., Bauer, L., Goldfarb, D., Yan, F., Major, M.B., and Peifer, M. (2020). Wnt Regulation: Exploring Axin-Dishevelled interactions and defining mechanisms by which the SCF E3 ubiquitin ligase is recruited to the destruction complex. *Mol Biol Cell*, in press.

Scheres, S.H.W. (2012). A Bayesian view on cryo-EM structure determination. *J Mol Biol* *415*, 406-418.

Schindelin, J., Arganda-Carreras, I., Frise, E., Kaynig, V., Longair, M., Pietzsch, T., Preibisch, S., Rueden, C., Saalfeld, S., Schmid, B., *et al.* (2012). Fiji: an open-source platform for biological-image analysis. *Nat Methods* *9*, 676-682.

Schwartz, R.M., and Dayhoff, M. (1978). Matrices for detecting distant relationships. In *Atlas of Protein Sequence and Structure*, M. Dayhoff, ed. (Silver Spring, MD: National Biomedical Research Foundation), pp. 353–358.

Schwarz-Romond, T., Fiedler, M., Shibata, N., Butler, P.J., Kikuchi, A., Higuchi, Y., and Bienz, M. (2007a). The DIX domain of Dishevelled confers Wnt signaling by dynamic polymerization. *Nat Struct Mol Biol* *14*, 484-492.

Schwarz-Romond, T., Merrifield, C., Nichols, B.J., and Bienz, M. (2005). The Wnt signaling effector Dishevelled forms dynamic protein assemblies rather than stable associations with cytoplasmic vesicles. *J Cell Sci* *118*, 5259-5277.

Schwarz-Romond, T., Metcalfe, C., and Bienz, M. (2007b). Dynamic recruitment of Axin by Dishevelled protein assemblies. *J Cell Sci* *120*, 2402-2412.

Smalley, J.J., Signoret, N., Robertson, D., Tilley, A., Hann, A., Ewan, K., Ding, Y.C., Paterson, H., and Dale, T.C. (2005). Dishevelled (Dvl-2) activates canonical Wnt signalling in the absence of cytoplasmic puncta. *J Cell Sci* *118*, 5279-5289.

Smalley, M.J., Sara, E., Paterson, H., Naylor, S., Cook, D., Jayatilake, H., Fryer, L.G., Hutchinson, L., Fry, M.J., and Dale, T.C. (1999). Interaction of Axin and Dvl-2 proteins regulates Dvl-2-stimulated TCF-dependent transcription. *EMBO J* *18*, 2823-2835.

Snead, W.T., and Gladfelter, A.S. (2019). *Mol Cell* *76*, 295-305.

Stamos, J.L., Chu, M.L., Enos, M.D., Shah, N., and Weis, W.I. (2014). Structural basis of GSK-3 inhibition by N-terminal phosphorylation and by the Wnt receptor LRP6. *eLife* *3*, e01998.

Stamos, J.L., and Weis, W.I. (2013). The  $\beta$ -catenin destruction complex. *Cold Spring Harb Perspect Biol* *5*, a007898.

Tan, C.W., Gardiner, B.S., Hirokawa, Y., Layton, M.J., Smith, D.W., and Burgess, A.W. (2012). Wnt signalling pathway parameters for mammalian cells. *PLoS One* 7, e31882.

Tauriello, D.V.F., Jordens, I., Kirchner, K., Sloatstra, J.W., Kruitwagen, T., Bouwman, B.A.M., Noutsou, M., Rudiger, S.G.D., Schwamborn, K., Schambony, A., *et al.* (2012). Wnt/ $\beta$ -catenin signaling requires the interaction of the Dishevelled DEP domain and C terminus with a discontinuous motif in Frizzled. *Proc Natl Acad Sci U S A* 109, E812-E820.

Törö, I., Basquin, J., Teo-Dreher, H., and Suck, D. (2002). Archaeal Sm proteins form heptameric and hexameric complexes: crystal structures of the Sm1 and Sm2 proteins from the hyperthermophile *Archeoglobus fulgidus*. *J Mol Biol* 320, 129-142.

Wolf, J., Palmby, T.R., Gavard, J., Williams, B.O., and Gutkind, J.S. (2008). Multiple PPPS/TP motifs act in a combinatorial fashion to transduce Wnt signaling through LRP6. *FEBS Lett* 582, 255-261.

Yamanishi, K., Fiedler, M., Terawaki, S., Higuchi, Y., Bienz, M., and Shibata, N. (2019a). A direct heterotypic interaction between the DIX domains of Dishevelled and Axin mediates signaling to  $\beta$ -catenin. *Science Signal* 12, eaaw5505.

Yamanishi, K., Sin, Y., Terawaki, S., Higuchi, Y., and Shibata, N. (2019b). High-resolution structure of a Y27W mutant of the Dishevelled2 DIX domain. *Acta Crystallogr F* 75, 116-122.

Zivanov, J., Nakane, T., Forsberg, B.O., Kimanius, D., Hagen, W.J., Lindahl, E., and Scheres, S.H. (2018). New tools for automated high-resolution cryo-EM structure determination in RELION-3. *eLife* 7, e42166.

## FIGURE LEGENDS

**Figure 1. Preparation and characterization of Dvl2 DIX filaments. (A)** Dvl2 DIX filaments were produced by cleavage of the MBP tag with TEV protease. The fusion protein is 52 kDa (MBP is 42 kDa, and the Dvl2 DIX domain is 10 kDa). **(B)** Molecular mass of Dvl2 DIX filaments measured by Multi-Angle Light Scattering coupled to size-exclusion chromatography (SEC-MALS). Dvl2 DIX at ~200  $\mu$ M produced as in (A) was run on a Superose 6 10/300 column in line with MALS and refractive index (RI) detectors. The molar mass (left Y-axis) of Dvl2 DIX filaments was calculated over a range of elution volumes (X-axis), with the average mass ranging from 9.5 MDa for the earliest-eluting species to 4.9 MDa for the latest-eluting species. Residual MBP elutes after DIX filaments. The LS:dRI ratio for DIX filaments is large relative to that of MBP, so the LS and dRI signals have been normalized to show the near congruity of LS and dRI traces for DIX filaments. **(C)** Concentration dependence of Dvl2 DIX filament formation measured by sedimentation. A representative experiment is shown: MBP-Dvl2 DIX at the indicated concentrations was digested with TEV protease, centrifuged, and the supernatant (S) and pellet (P) fractions run on SDS-PAGE. The five highest concentration samples were diluted prior to loading to prevent overloading; since the TEV concentration is constant in each sample, this dilution makes the TEV band intensity different in these lanes. **(D)** Data from six replicates of the experiment shown in (C) were quantified and plotted as shown.

**Figure 2. Cryo-EM structure of Dvl2 DIX filaments reveals anti-parallel double helices stabilized by intra- strand (head-tail) and inter-strand contacts. (A)** Cryo-EM image of purified Dvl2 DIX filaments. **(B)** Final sharpened cryo-EM map with helical symmetry imposed, with the two antiparallel strands shown in green and blue contours. **(C)** Final model of the Dvl2 DIX anti-parallel double helix, containing 12 subunits. The secondary structure elements are marked in the upper brown copy. The schematic diagram on the right shows the antiparallel structure, with each subunit represented as a triangle colored as in (B). **(D)** A portion of the final cryo-EM map (wire frame) and model showing a head-to-tail interface involving Y27 (head) packing against F56 and K68 (tail).

**Figure 3. Point mutations disrupt double stranded filament formation and Dvl signaling. (A)** Comparison of TEV-cleaved Dvl2 DIX variants run on a Superose 6 size-exclusion column. WT Dvl2 DIX elutes early in a broad peak, whereas point mutants that interfere with filament contacts exhibit varying degrees of oligomerization, manifesting as later elution volumes (smaller sizes). The MBP tag (42 kDa; elution volume = 18 mL) represents the largest peak by  $A_{280}$ . The separation of the Y27D and G65D from the MBP can be seen on a Superdex 75 column, shown in Fig. S3. **(B)** Inter-strand contacts within Dvl2 double helix. **(C)** Mutations of individual residues at intra- (Y27D) and inter- (M60A, G65D, N82D) strand interfaces cause defects in Wnt-dependent  $\beta$ -catenin signaling. Dvl2 constructs are expressed at near endogenous

levels in Dvl Triple Knockout (TKO) cell line (see Fig. S2 for more details). A construct with the Dvl2 DIX domain deleted ( $\Delta$ DIX) is also shown.

**Figure 4. Oligomerization of Axin1 DAX and effects of oligomerization on signaling.** (A) Comparison of TEV-cleaved Axin1 DAX and Dvl2 DIX variants run on a Superose 6 size exclusion column (NG= E815N/E816G, NQ/NG=D793N/E794Q/E815N/E816G). (B) SEC-MALS analysis of Axin1 DAX size as a function of concentration. (C) Superposition of the rat Axin1 crystal structure (PDB 1WSP; magenta) on chain B of the Dvl2 DIX domain (blue), showing potential clashes with DIX chain C (green) across the inter-strand interface. Also shown is the substitution of N82 in DIX with E815 in DAX, which would eliminate the hydrogen bond with D63 of DIX and introduce electrostatic repulsion. Axin residue numbers are from the human Axin1 sequence. (D) Cryo-electron micrograph of DAX NQ/NG filaments.

**Figure 5. Axin1 DAX solubilizes Dvl2 DIX filaments.** (A) Sedimentation of preformed DIX filaments (10  $\mu$ M) mixed with increasing amounts of purified wild-type DAX, showing shift of DIX from the pellet (P) into the supernatant (S) (denoted by  $\blacktriangle$ ). A representative SDS-PAGE gel (with a portion excised for clarity) is shown here. (B) Quantification of solubilization of DIX filaments by wild-type DAX (black curve) and DAX with mutations in the head interface (Y760D; green curve), tail (V800A/F801A; blue curve) interface, or both (Y760D/V800A/F801A; gray curve) carried out as in (A). (C) Representative images of 10  $\mu$ M fluorescently labeled DIX filaments in the absence and presence of 50  $\mu$ M purified DAX, showing increase in background fluorescence associated with filament disruption. Scale bar = 5  $\mu$ m. (D) Model for DAX incorporation into a filamentous DIX oligomer *in vitro*.

**Figure 6.** Wnt-dependent  $\beta$ -catenin signaling by Dvl2 constructs containing DIX mutants affecting either the intra- (Y27D) or inter- (DC, DE) strand interactions (dark gray); replacement of DIX with wild-type or mutant DAX domains (pink); or addition of heterologous oligomerization domains (Sm1, light gray; Tankrase2 SAM, green) expressed at near-endogenous levels in Dvl triple knockout (TKO) HEK293 cells, as measured by TOPFLASH. Schematic diagrams of the constructs are shown to the left: the portion of Dvl C-terminal to the DIX domain is shown in black, the Dvl DIX domain in blue, the Axin1 DAX domain in pink, the Sm1 heptamerization domain in light gray, and the Tankyrase2 SAM domain in green. The red asterisks indicate 1) the DIX Y27D or the equivalent DAX Y760D head mutant that blocks oligomerization, or 2) mutated sites within DAX that increase filament-forming propensity (DAX<sub>NQ/NG</sub>, DAX<sub>NG</sub>). Red pluses indicate residue insertions (DC, DE) that interfere with the DIX inter-strand interface.

**Figure 7. Dvl2 forms small oligomers in cells. (A)** Setup for live cell TIRF imaging of the apical membrane of HEK293T Dvl2-GFP/Axin1-dsRed knockin cells. **(B)** Representative TIRF image. Scale bar = 5  $\mu\text{m}$ . **(C)** Distribution of measured spot intensities shown as the average number of GFPs equivalent to measured value.

**Figure 8. Dvl DIX oligomerization in Axin recruitment upon Wnt signaling.** (Upper left) Schematic diagram of Dvl primary structure and association of Dvl DIX into an oligomer. A Dvl DIX oligomer provides up to 4 binding sites for Axin, one at each end of each paired strand. (Lower left) In the absence of Wnt signaling, self-association of the Axin DAX domain and multivalent interactions of Axin with APC create a crosslinked, possibly phase separated, destruction complex with multiple copies of the constituent proteins. (Right) The Dvl DEP domain (green oval) binds to Fzd and the Dvl oligomer associates with up to 4 Axin DAX domains. GSK-3 bound to Axin generates its own inhibitor by phosphorylating the LRP5/6 cytoplasmic tail. Axin DAX binding to the ends of the DIX oligomer provides an optimal relative stoichiometry of GSK-3-bound Axin and LRP5/6 to enable efficient inhibition of GSK-3. Some bound Axin molecules as well as DEP domains from the Dvl oligomer may interact with other receptor complexes, thereby producing a crosslinked signalosome.

## SUPPLEMENTAL FIGURE LEGENDS

**Figure S1. Cryo-EM analysis of Dvl2 DIX filaments. (A)** Representative 2D class averages of sections of filaments in a 150  $\text{\AA}$  by 150  $\text{\AA}$  box. **(B)** 3D classes. Particles belonging to the boxed 3D classes were used for the final reconstruction. **(C)** Unsharpened and sharpened maps. **(D)** Fourier Shell correlation coefficient as a function of resolution. The resolution is indicated at FSC=0.143. **(E)** Local resolution estimation displayed on the sharpened map. **(F)** A representative subunit in map density, contoured at  $2.7\sigma$ . **(G)** Map-to-model Fourier Shell correlation coefficients as a function of resolution. The resolution is indicated at FSC=0.5.

**Figure S2. Expression levels of Dvl2 mutants in HEK293T Dvl TKO cells.** To measure the relative expression of Dvl2 constructs, whole cell lysates of Dvl TKO cells transfected with the indicated Dvl2 construct were analyzed by SDS-PAGE and imaged as anti-Dvl2 immunoblots. Expression levels from each transient transfection were closely matched to endogenous levels (marked as End. Dvl2). The average relative expression level of each mutant relative to WT Dvl2, as quantified using a Li-COR Odyssey 3.0 scanner, is indicated below its label. For clarity, unrelated lanes from a single gel blot were excised from the image, denoted by a slight gap. Different blots are separated by large gaps in the figure. Dvl2 constructs are abbreviated as follows: DE= 60\*DE\*61, DC= 64\*DC\*65, EE>KK= E22K/E24K, EE>QQ= E22Q/E22Q, NG= E815N/E816G, NQ/NG=D793N/E794Q/ E815N/E816G, T2SAM= Tankyrase2 SAM.

**Figure S3. Purification of WT DAX and size-exclusion chromatography (SEC) of DIX oligomerization mutants.**-(A) SEC profiles of purified Axin1 DAX and Dvl2 DIX mutants Y27D, G65D, and DIX<sub>DE</sub> on a Superdex 75 column 10/300. Proteins were injected at 60  $\mu$ M (dashed lines) or 180  $\mu$ M (solid lines). G65D was run only at 60  $\mu$ M and contained considerable MBP contamination from the previous purification step. Note that both Axin1 DAX and the inter-strand interface mutant DIX<sub>DE</sub> (60\*DE\*61) exhibit a concentration-dependent increase in size, in contrast to intra-strand interface mutant DIX Y27D, consistent with the ability to form head-to-tail contacts. (B) Comparison of SEC profiles of Dvl2 DIX mutants that were designed to disrupt intra-strand head-tail interactions (DIX<sub>Y27D</sub>) and inter-strand interface interactions (DIX<sub>DE</sub>= 60\*DE\*61, DIX<sub>DC</sub>= 64\*DC\*65). Unlike in (A), protein constructs here were directly injected onto S75 column as crude TEV protease digests. Due to incomplete TEV digestion and the fact that MBP (peak elution volume at  $\sim$ 11 mL) has a much larger absorbance than DIX, the top panel was re-plotted at the bottom to focus on later elution volumes (which correspond to smaller oligomer sizes) where DIX proteins are found. (C) Gel fractions from each run covering the DIX peak (with “▲” marking the center of the peak). Both the DE and DC insertion mutants of Dvl2 DIX (DE, DC) elute earlier than Dvl2 DIX<sub>Y27D</sub>.

**Figure S4. Sequence alignment of selected Dvl and Axin DIX domains.** Dvl DIX domains are shown in the top block; sequence numbers correspond to the mouse Dvl2 domain used in this paper, which is identical to the human sequence shown. Axin DAX domains are shown in the lower block; sequence numbers correspond to human Axin1 sequence used in this study. Secondary structure elements are indicated. Arrowheads indicate sites of mutations used in this study. Black shading indicates 100% similarity; dark grey, 80-99% similarity; light grey, 60-79% similarity; and no shading, <60% similarity. Alignment was carried out in Geneious version 10.2.6 (Kearse et al., 2012) using the ClustalOmega plugin (Madeira et al., 2019). Similarity was calculated using the PAM250 algorithm (Schwartz and Dayhoff, 1978) with a threshold of 1.

**Figure S5. Change in mean fluorescence in TIRF DIX filament assay in the absence and presence of DAX.** Mean gray values (MGVs) in field of view were measured from multiple frames of AlexaFluor647-labeled DIX filaments in TIRF without DAX and with DAX addition. Each measurement was normalized against the mean MGv of DIX fluorescence without DAX within a technical replicate, *i.e.*, the mean fold increase for “No DAX” measurements= 1.0. In total, data were collected from two technical replicates within each of two biological sample replicates. Addition of DAX to fluorescent DIX filaments significantly ( $p < 0.05$ , Mann-Whitney U Test) increased the MGv in the field of view compared to “No DAX” 2.32 fold, with a standard deviation of 0.45 estimated by bootstrapping (see STAR Methods).

**Figure S6. Native gel analysis of DIX filament mobility in the presence of DAX.**

Left, Axin1 DAX improves mobility of native Dvl2 DIX proteins in a concentration-dependent manner. Dvl2 DIX samples, labeled with AlexaFluor 488 (protocol as described for filaments used in TIRF imaging), were mixed with Axin1 DAX at the indicated concentrations. Each 15  $\mu$ L reaction mix was diluted with 5x native loading buffer and run on a native PAGE gel to separate complexes based on differences in electrophoretic mobility. As indicated in the native PAGE panel (green box) and in the plotted band intensity distributions for each lane (purple box), increasing DAX concentrations shifted the distribution of DIX-488 populations towards more mobile (i.e., smaller) species. DIX-488 fluorescence was visualized using the SYBR Green setting on a Biorad Gel Doc EZ. Although some MBP/MBP-DIX could be detected using this setting, unlabeled DAX samples run on an SDS-PAGE gel (blue box) could not be detected using the same acquisition and image contrast settings. Right, full unannotated images of protein gels used in the left figure.

**Figure S7. A conserved electronegative groove in the Dvl2 DIX double helix enables association with Axin1 DAX.**

**(A)** Electrostatic surface rendering of the Dvl2 double helix. Negative potential shown in red, positive in blue. The electrostatic surface was calculated with ABPS (Baker et al., 2001) on a model prepared with PDB2PQR (Dolinsky et al., 2004). **(B)** Cryo-electron micrograph of Dvl2 DIX QQ mutant filaments. **(C)** Quantitation of solubilization of wild-type (in black), QQ (in green), or KK (in blue) Dvl2 DIX filaments by wild-type Axin1 DAX. **(D)** TOPFLASH assay for Wnt-dependent  $\beta$ -catenin signaling of Dvl2 electrostatic groove mutants expressed at near-endogenous levels in HEK293T Dvl triple knockout cells. Dvl2 Y27D is included for reference. Dvl2 constructs were abbreviated as follows: QQ=E22Q/E24Q; KK=E22K/E24K.

**Figure S8. Characterization of Dvl2-GFP/Axin1-dsRed knockin HEK293T cells.**

**(A)** Anti-Dvl2 western blot of whole cell lysates from Dvl TKO cells, wild-type HEK 293T cells, and the Dvl2-GFP/Axin1-dsRed knockin HEK293T cells. **(B)** TOPFLASH assay of Dvl2-GFP/Axin1-dsRed knockin HEK293T cells. **(C)** Increase in cellular  $\beta$ -catenin in HEK293T Dvl2-GFP/Axin1-dsRed cells upon Wnt3A stimulation, detected as an increase in  $\beta$ -catenin staining (red). Representative fields of view for anti- $\beta$ -catenin immunofluorescence are shown here. Scale bar = 10  $\mu$ m. **(D)** Mean  $\beta$ -catenin staining intensity. Each point represents the mean value from a single image of a field of cells similar to what is shown in (C). **(E)** Spot detection with u-track (Jaqaman et al., 2008). Background subtracted Dvl2-GFP TIRF images without (left) and with (right) detection circles. Scale bar = 5  $\mu$ m.



**Supplemental Video 1. Dvl2-GFP long-term epifluorescent live cell imaging.** HEK293T Dvl2-GFP/Axin1-RFP cells were imaged in HEPES buffered media for ~15 hours.

**Table S1. Cryo-EM data collection, refinement and validation statistics**

| <b><u>Data collection and processing</u></b>        |           |
|-----------------------------------------------------|-----------|
| Magnification                                       | 29,000    |
| Voltage (kV)                                        | 300       |
| Electron exposure (e <sup>-</sup> /Å <sup>2</sup> ) | 98        |
| Defocus range (µm)                                  | 0.5–2.0   |
| Pixel size (Å)                                      | 1.00      |
| Symmetry imposed                                    | C1        |
| No. Initial particle images                         | 437,872   |
| No. Final particle images                           | 110,105   |
| Map resolution (Å)                                  | 3.6       |
| FSC threshold                                       | 0.143     |
| Map resolution range (Å)                            | 3.5 – 4.3 |
| Map sharpening <i>B</i> factor (Å <sup>2</sup> )    | -126      |
| <b><u>Refinement</u></b>                            |           |
| Initial model used (PDB code)                       | 6IW3      |
| Model resolution (Å)                                | 3.5       |
| FSC threshold                                       | 0.5       |
| Model composition                                   |           |
| Chains                                              | 12        |
| Non-hydrogen atoms                                  | 7,572     |
| Protein residues                                    | 936       |
| <i>B</i> factors (Å <sup>2</sup> )                  | 59.4      |
| R.m.s. deviations                                   |           |
| Bond lengths (Å)                                    | 0.004     |
| Bond angles (°)                                     | 0.65      |
| Validation                                          |           |
| MolProbity score                                    | 1.47      |
| Clashscore                                          | 4.58      |
| Poor rotamers (%)                                   | 0.00      |
| Ramachandran plot                                   |           |
| Favored (%)                                         | 96.4      |
| Allowed (%)                                         | 3.6       |
| Disallowed (%)                                      | 0         |

**Table S2. Summary of SEC-MALS runs on Axin constructs**

| <b>Construct</b> | <b>Concentration injected (<math>\mu\text{M}</math>)</b> | <b>Concentration at detector<sup>1</sup> (<math>\mu\text{M}</math>)</b> | <b>Absolute mass (kDa)</b> | <b>Protomers/oligomer<sup>2</sup></b> |
|------------------|----------------------------------------------------------|-------------------------------------------------------------------------|----------------------------|---------------------------------------|
| DAX              | 911                                                      | 24.                                                                     | 90                         | 8-10                                  |
| DAX              | 66.3                                                     | 5.0                                                                     | 41                         | 4                                     |
| DAX              | 22.1                                                     | 1.7                                                                     | 26                         | 2-3                                   |
| DAX              | 6.6                                                      | 0.71                                                                    | 15                         | 1-2                                   |
| DIDAX Y760D      | 57.1                                                     | 20.                                                                     | 22                         | 1                                     |
| DIDAX            | 68.7                                                     | 0.54                                                                    | 90-100                     | 4                                     |

<sup>1</sup>Directly measured from maximal dRI of peak.

<sup>2</sup>DAX and DAX Y760D are 9.9 kDa; DIDAX and DIDAX Y760D are 26 kDa.

**Table S3. Effect of including higher-order oligomers on estimation of DAX:DAX  $K_D$  from SEC-MALS.**

| Highest-order term included | $K_D$ |
|-----------------------------|-------|
| Dimer                       | 237   |
| Trimer                      | 672   |
| Tetramer                    | 844   |
| Pentamer                    | 907   |
| Hexamer                     | 932   |
| Heptamer                    | 941   |
| Octamer                     | 944   |
| Nonamer                     | 946   |
| Decamer                     | 946   |
| Undecamer                   | 946   |

The concentrations of each oligomeric species were determined by using Mathematica to numerically solve the system of equations that resulted from setting the total concentration of all protomers to 710 nM, the average mass to 15 kDa, and the dissociation constants for a monomer dissociating from the end of an oligomer all equal to each other, regardless of filament length. The  $K_D$  was then determined from  $K_D = \frac{[\text{monomer}]^2}{[\text{dimer}]}$ . An example of the system of equations for the trimer case is shown below, where  $m$  is the concentration of monomer in nM,  $d$  of dimer, and  $t$  of trimer.

The total DAX protomer concentration across all species must sum to 710 nM:

$$m + 2d + 3t = 710$$

The average mass must equal the measured 15 kD:

$$\frac{10m + 20d + 3t}{m + d + t} = 15$$

We assume the dissociation constants for a monomer dissociating from the end of an oligomer is independent of the length of the oligomer:

$$\frac{m^2}{d} = \frac{md}{t}$$

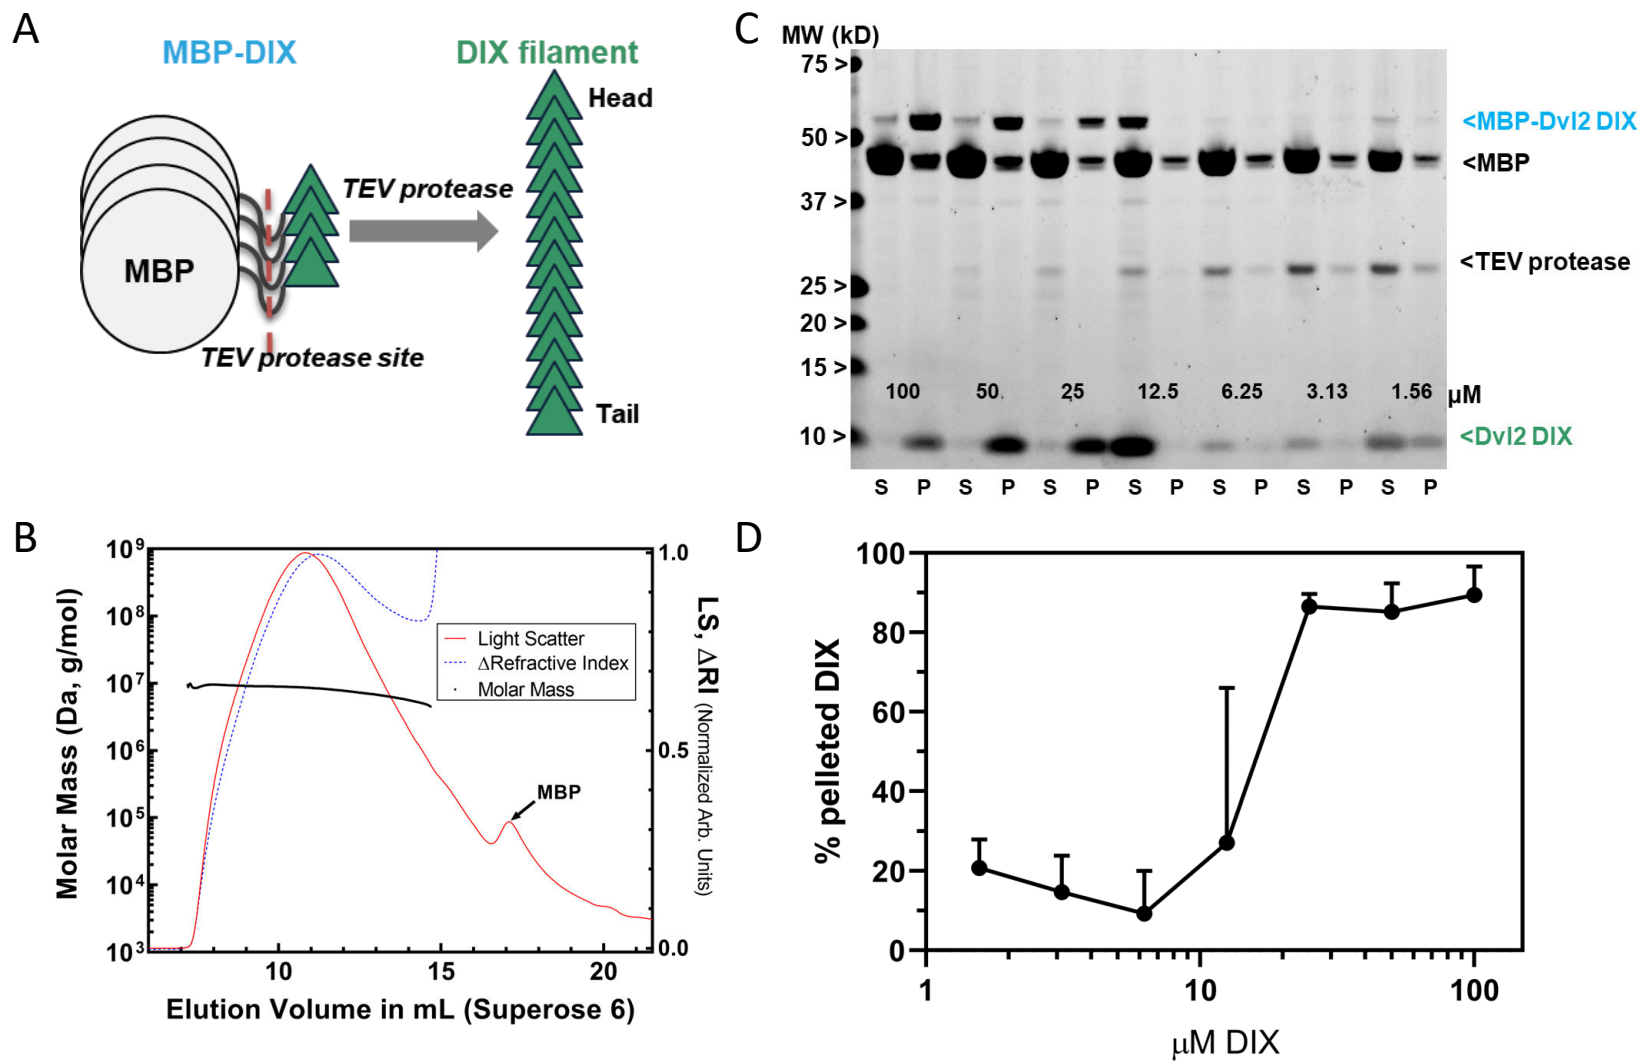

Fig. 2

A

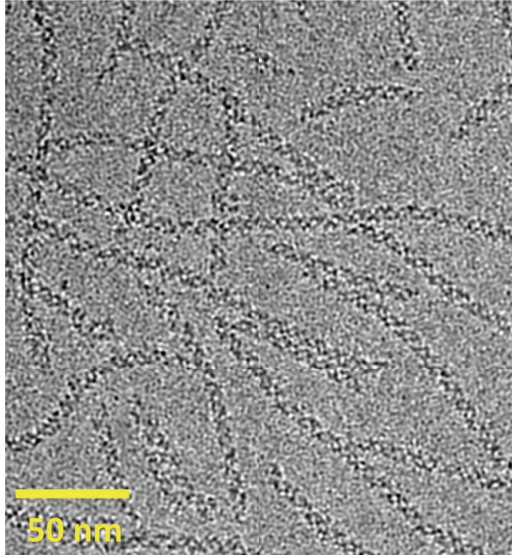

B

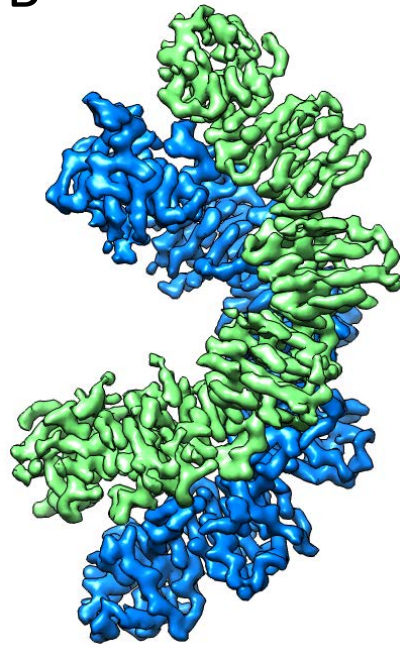

C

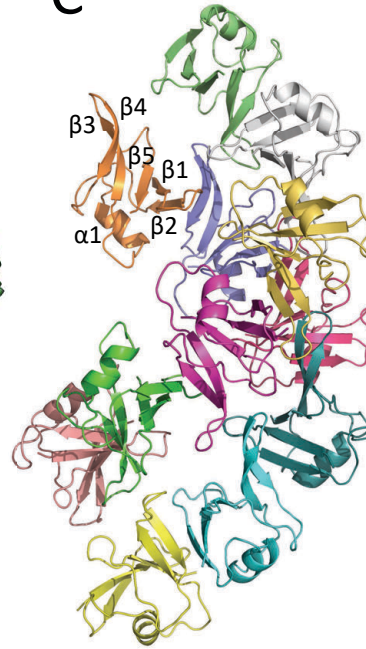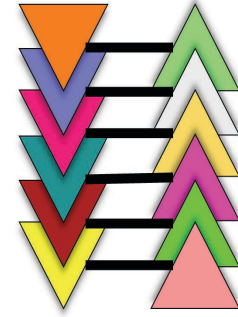

D

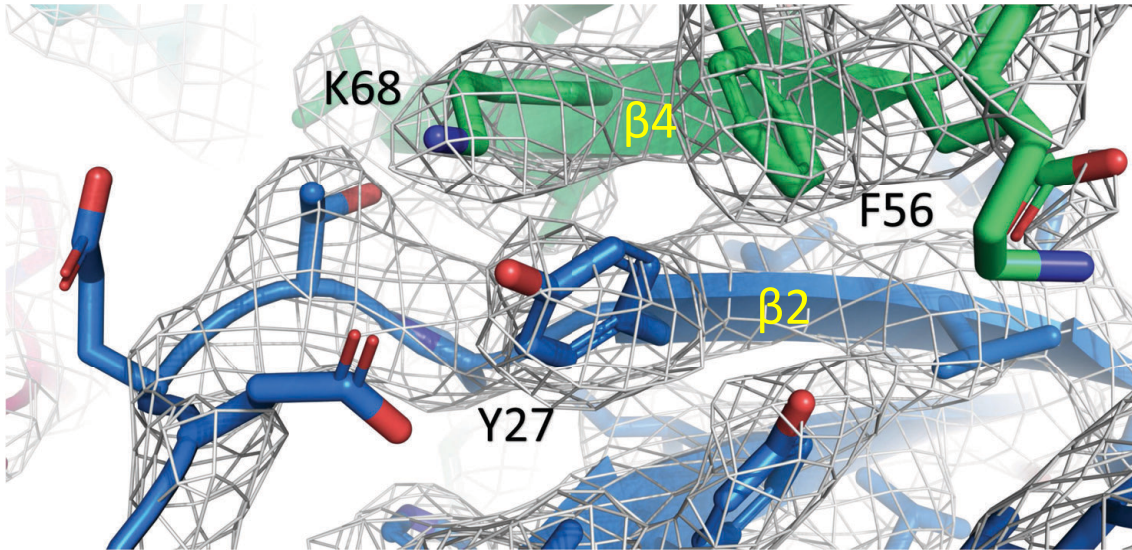

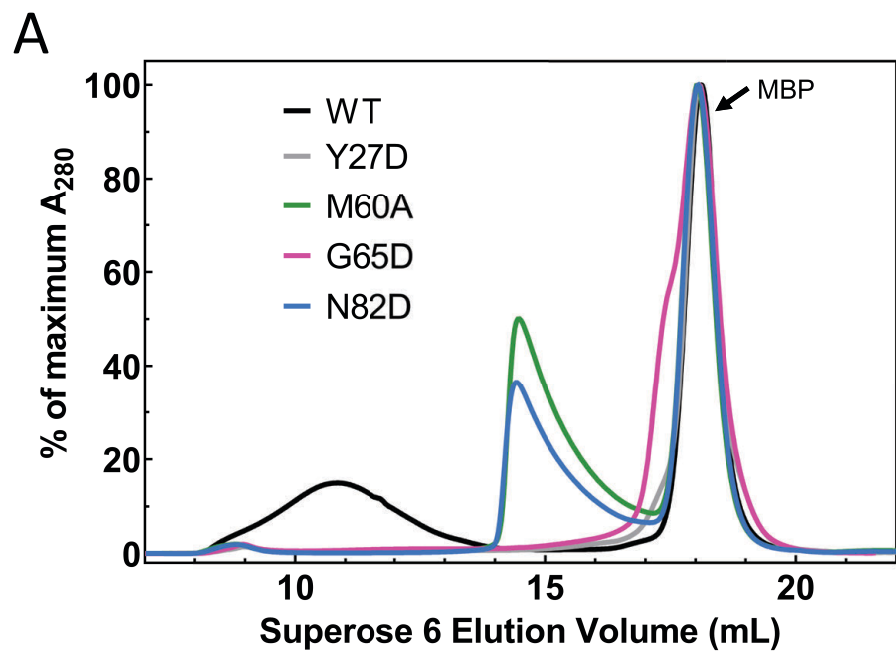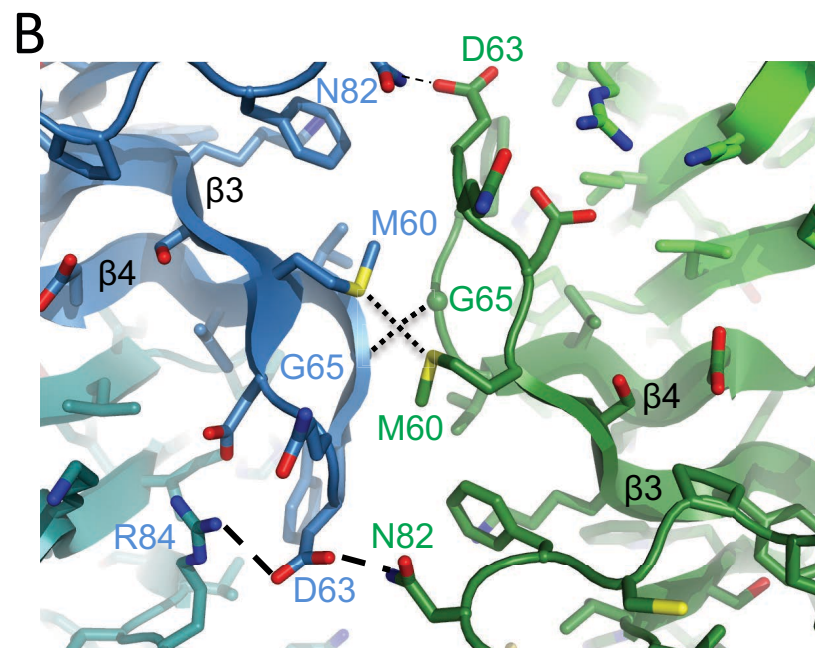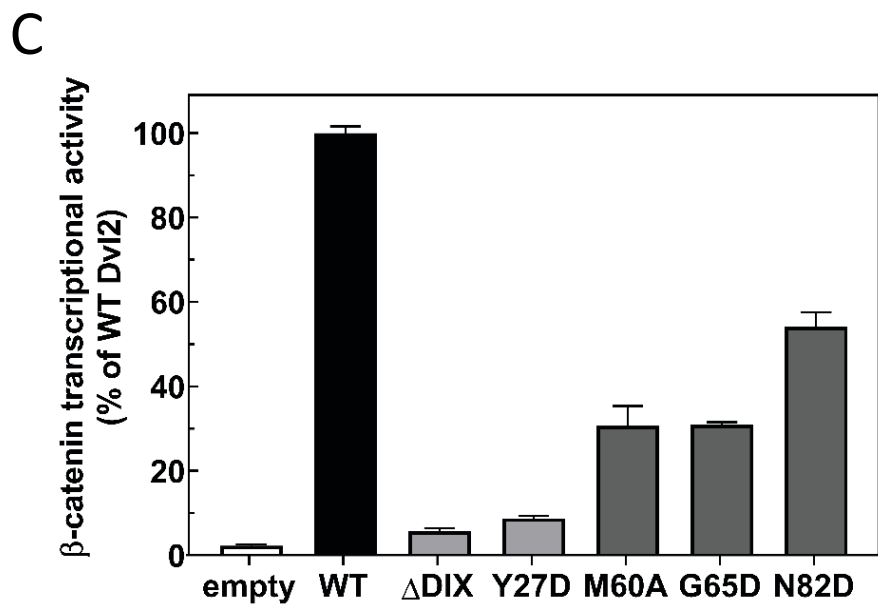

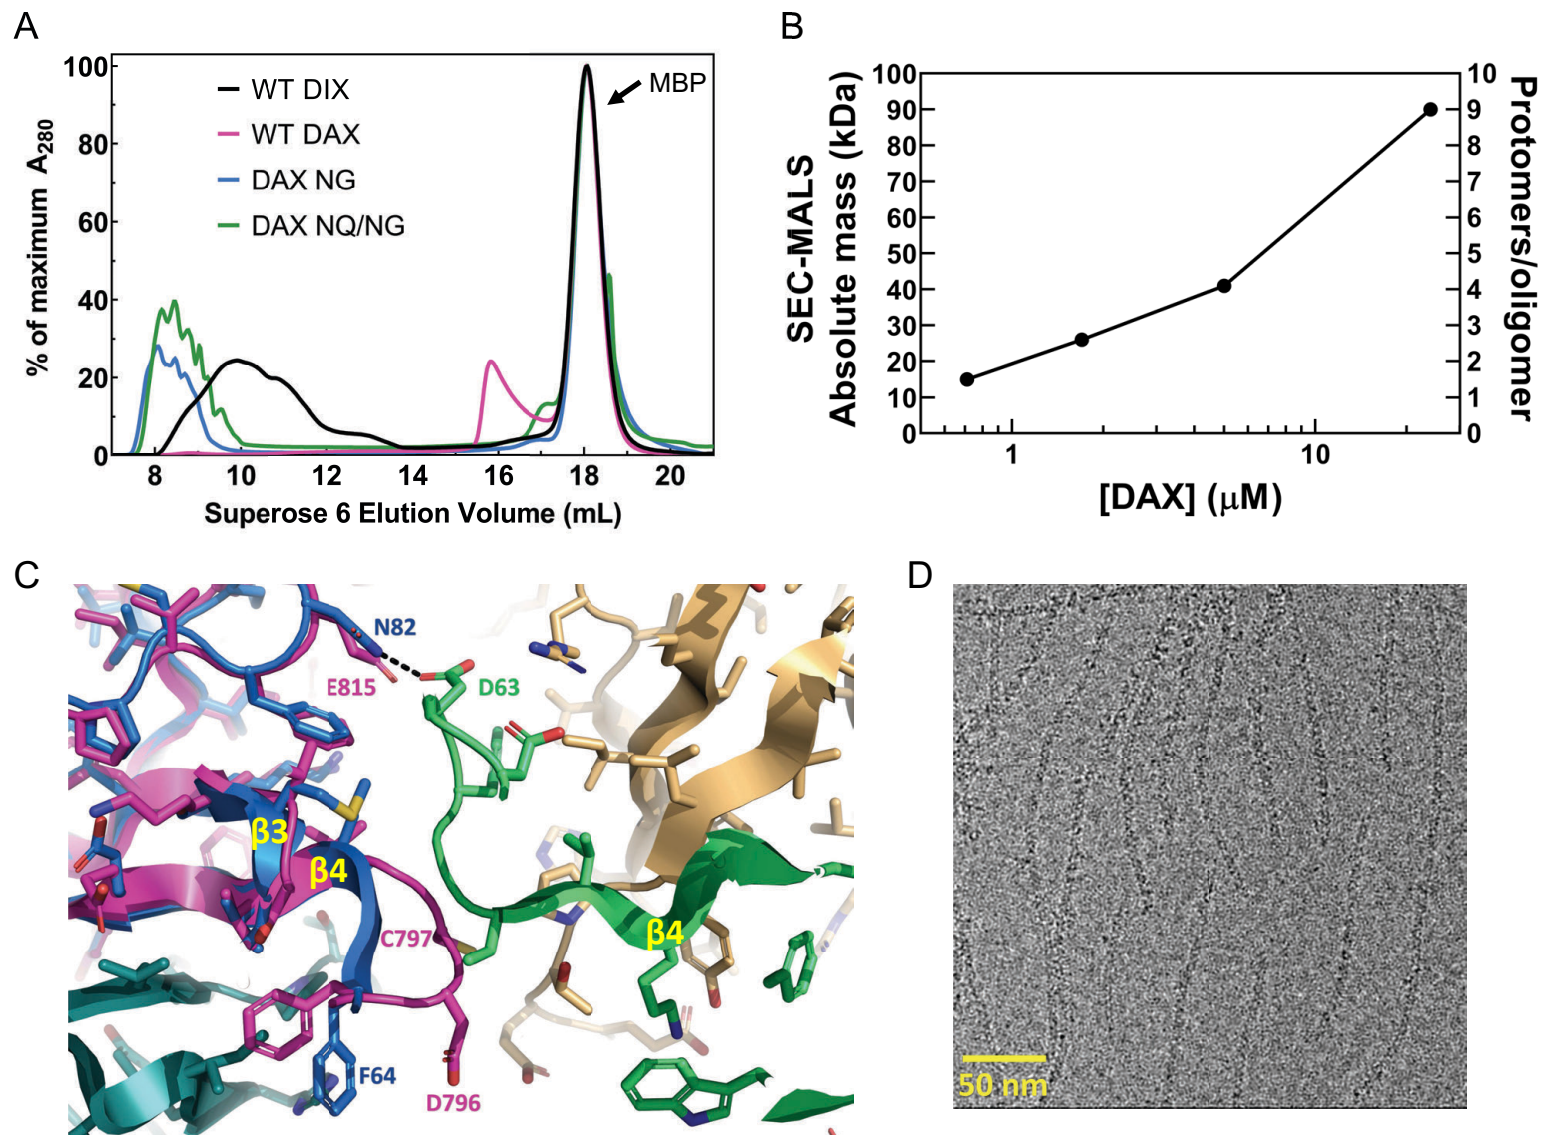



Fig. 5

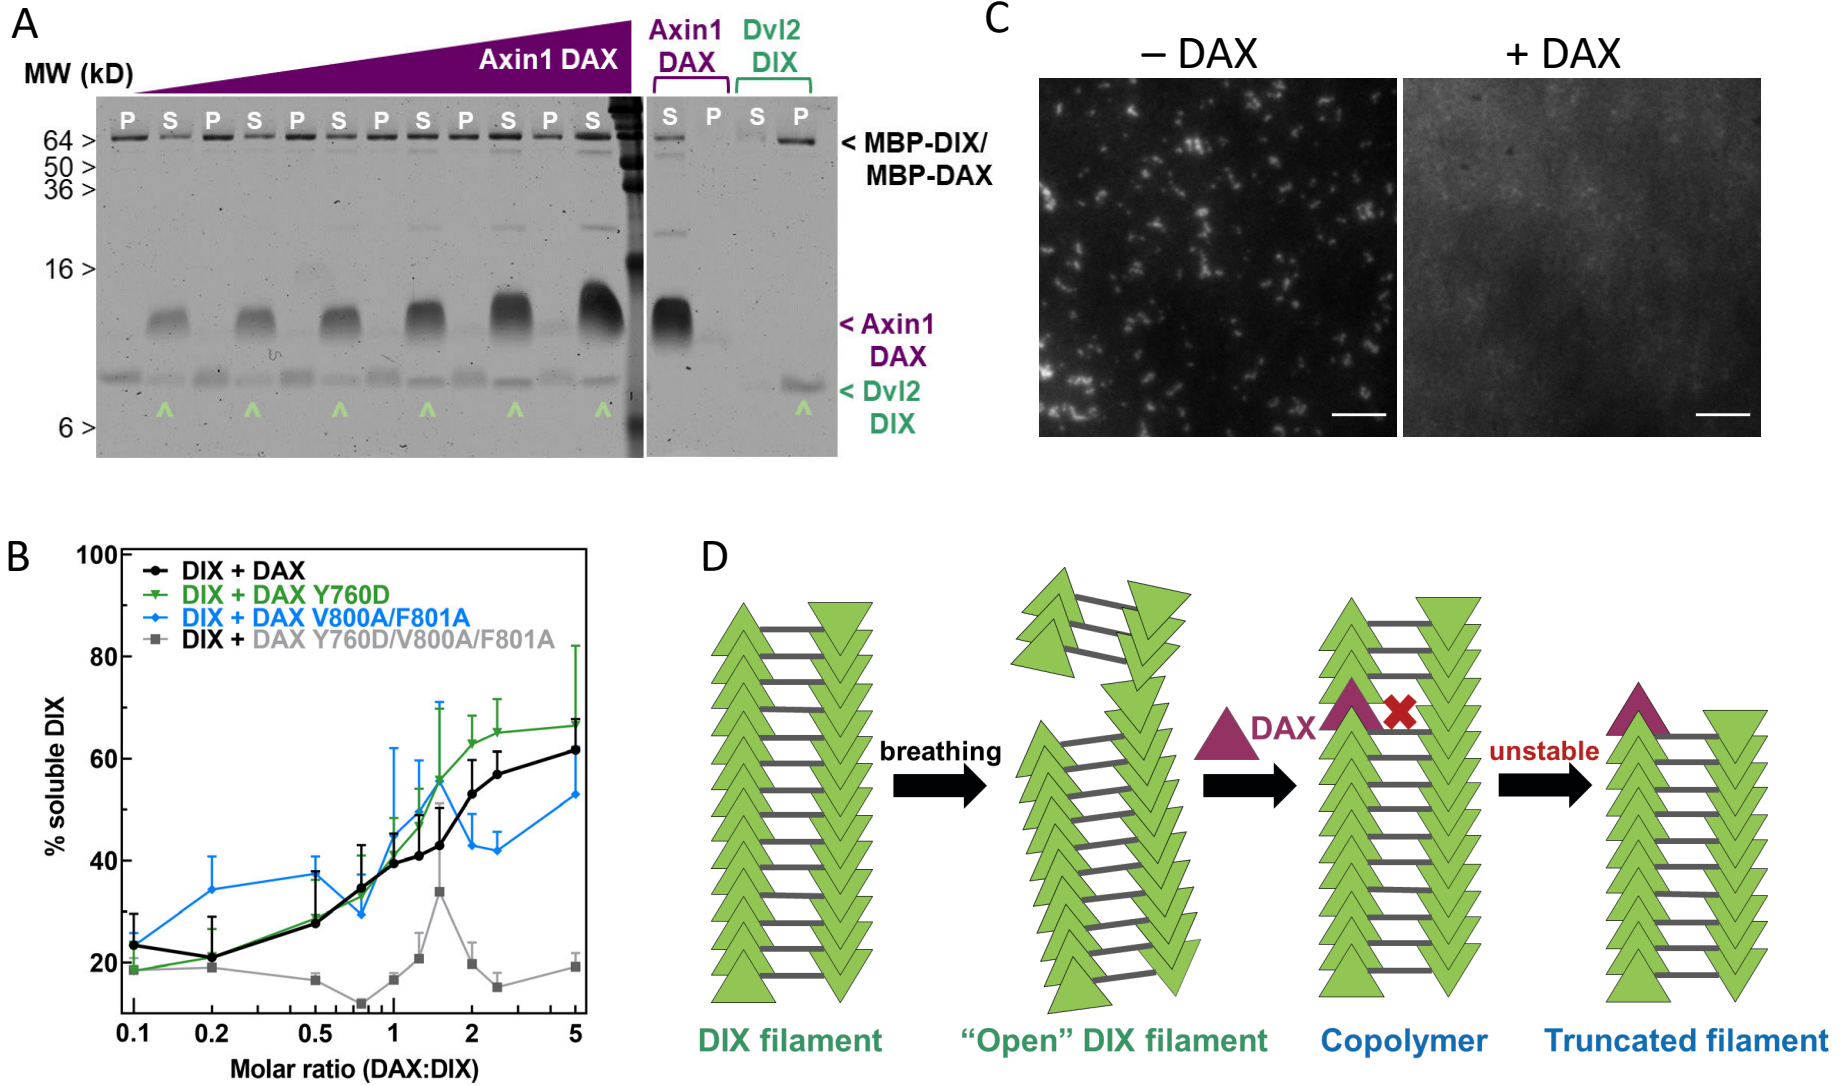

Fig. 6

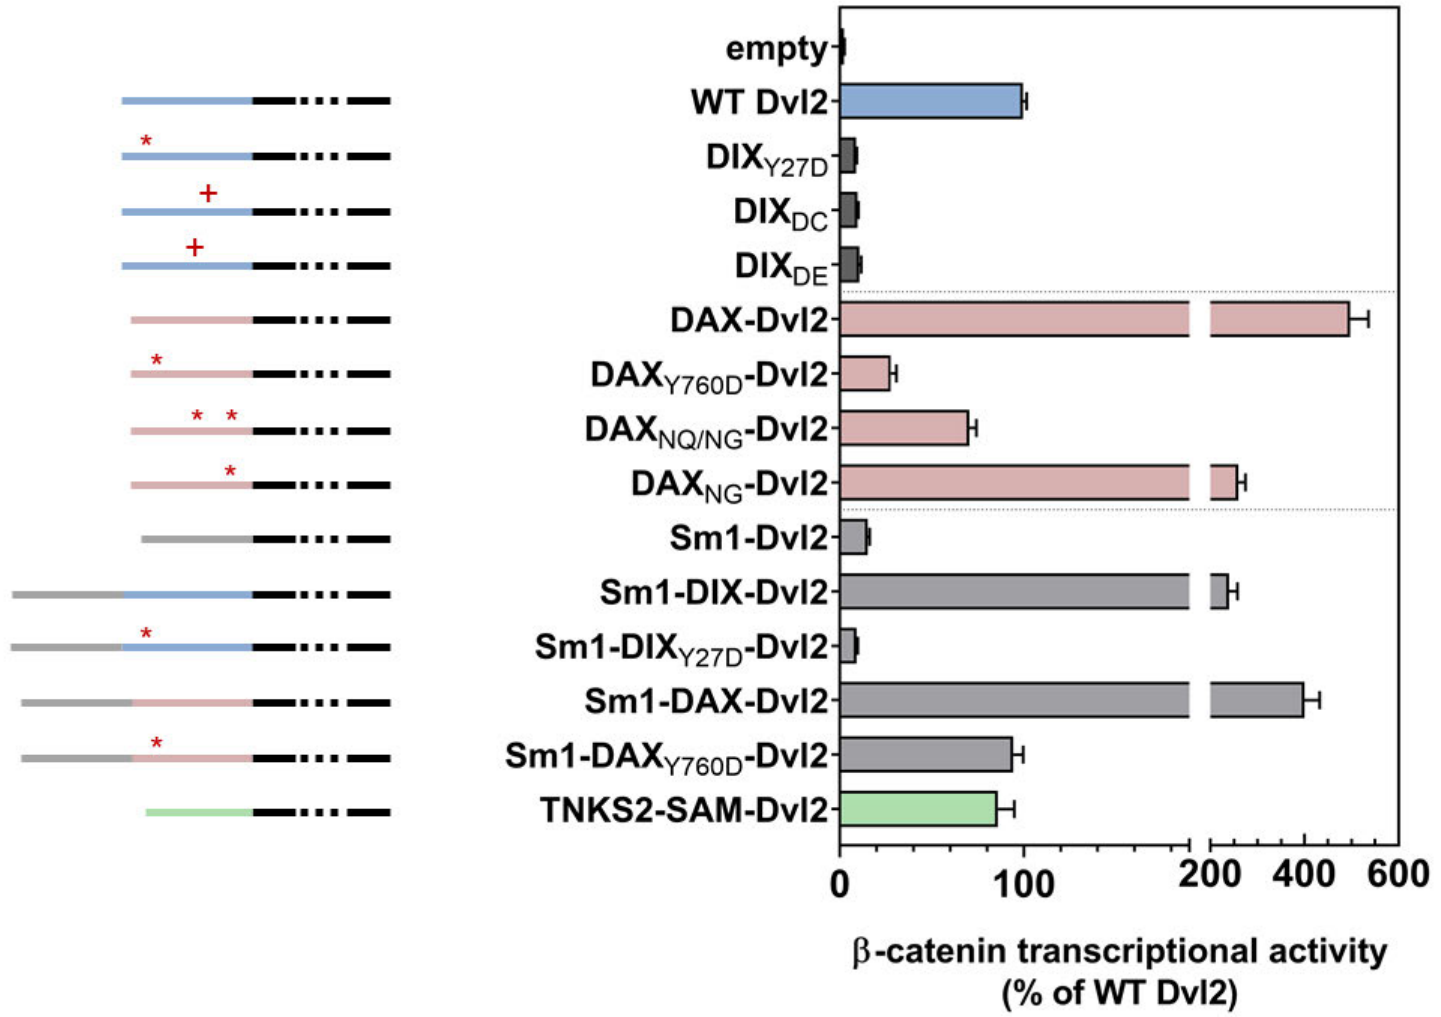

Fig. 7

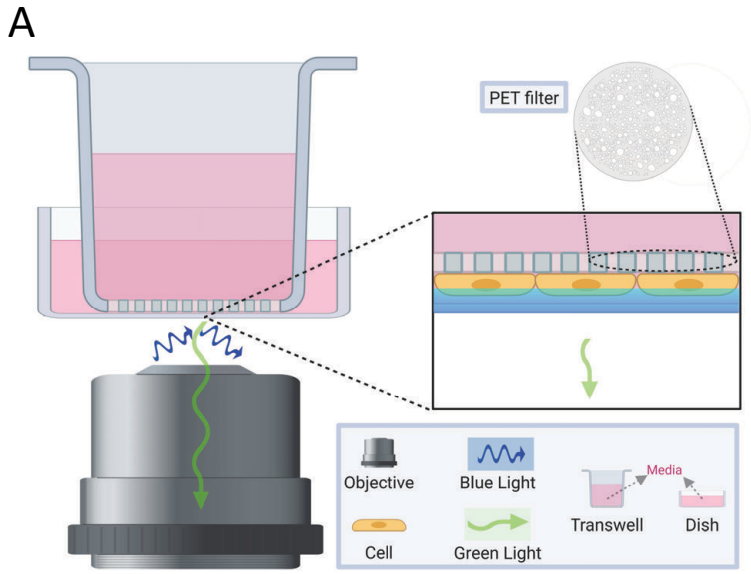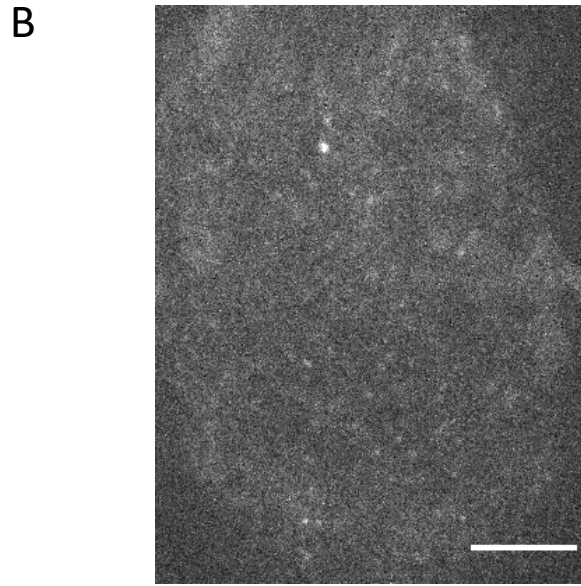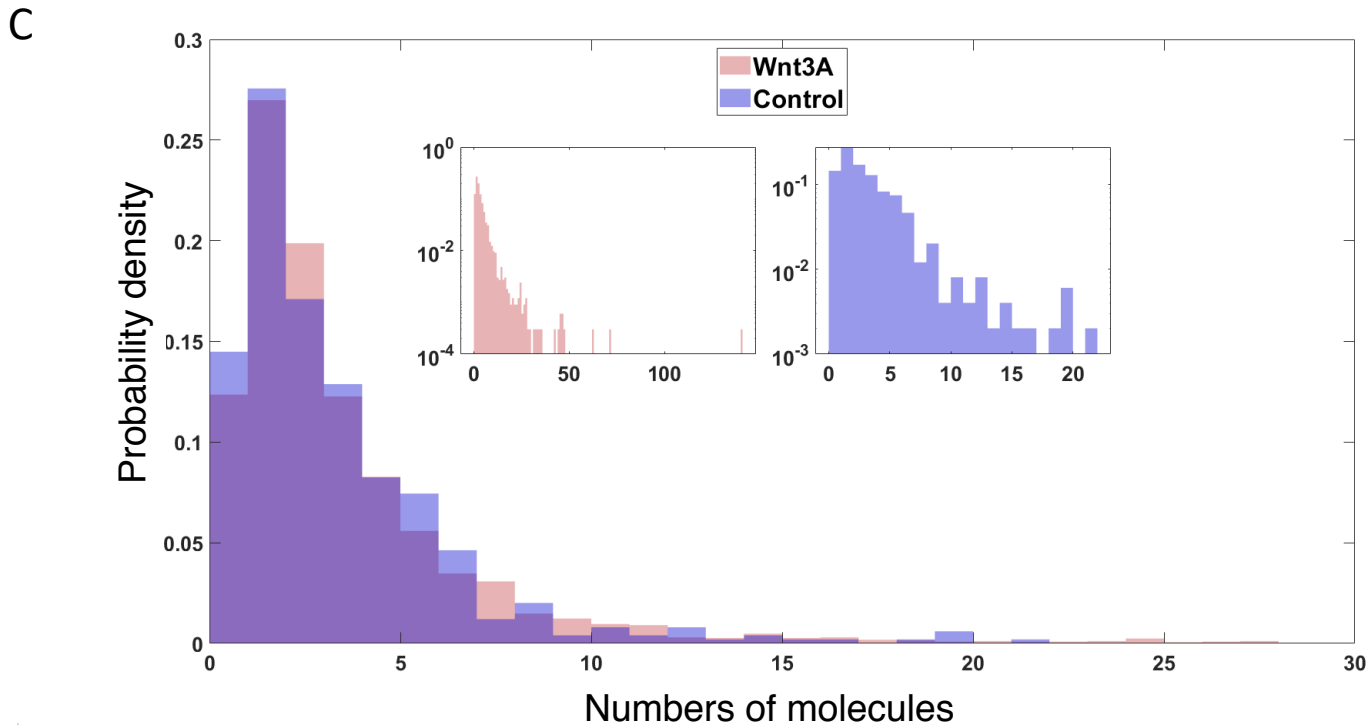

Fig. 8

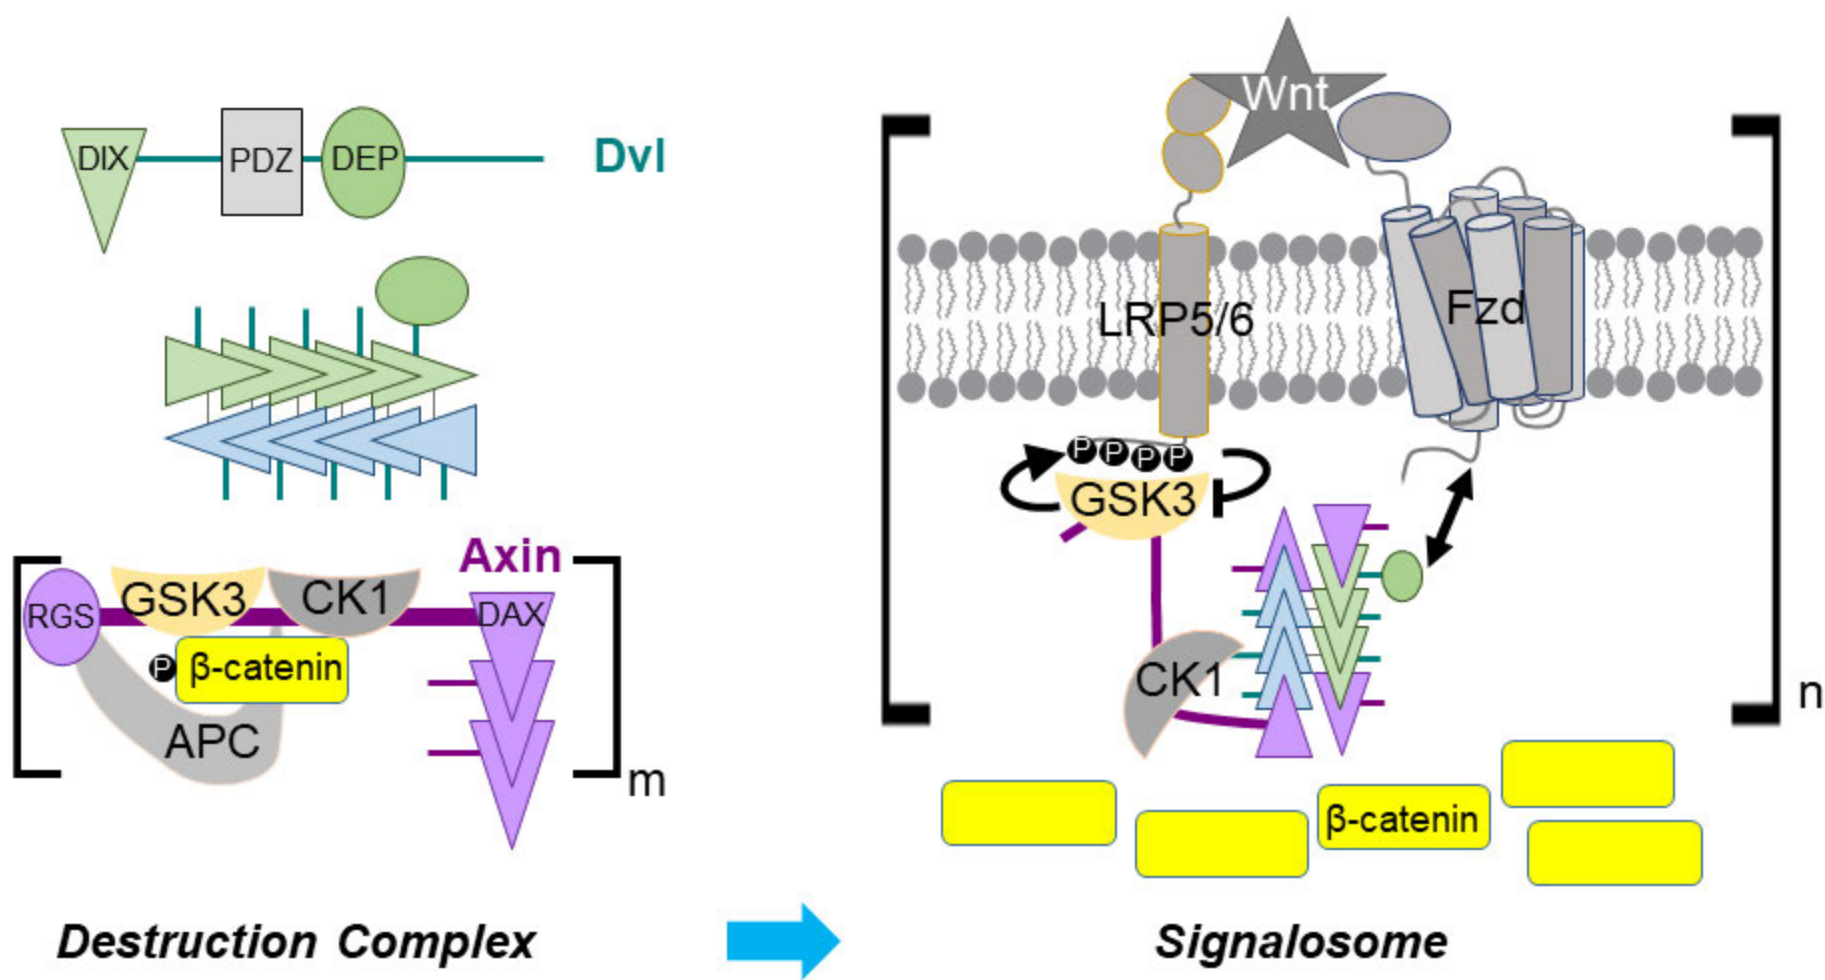

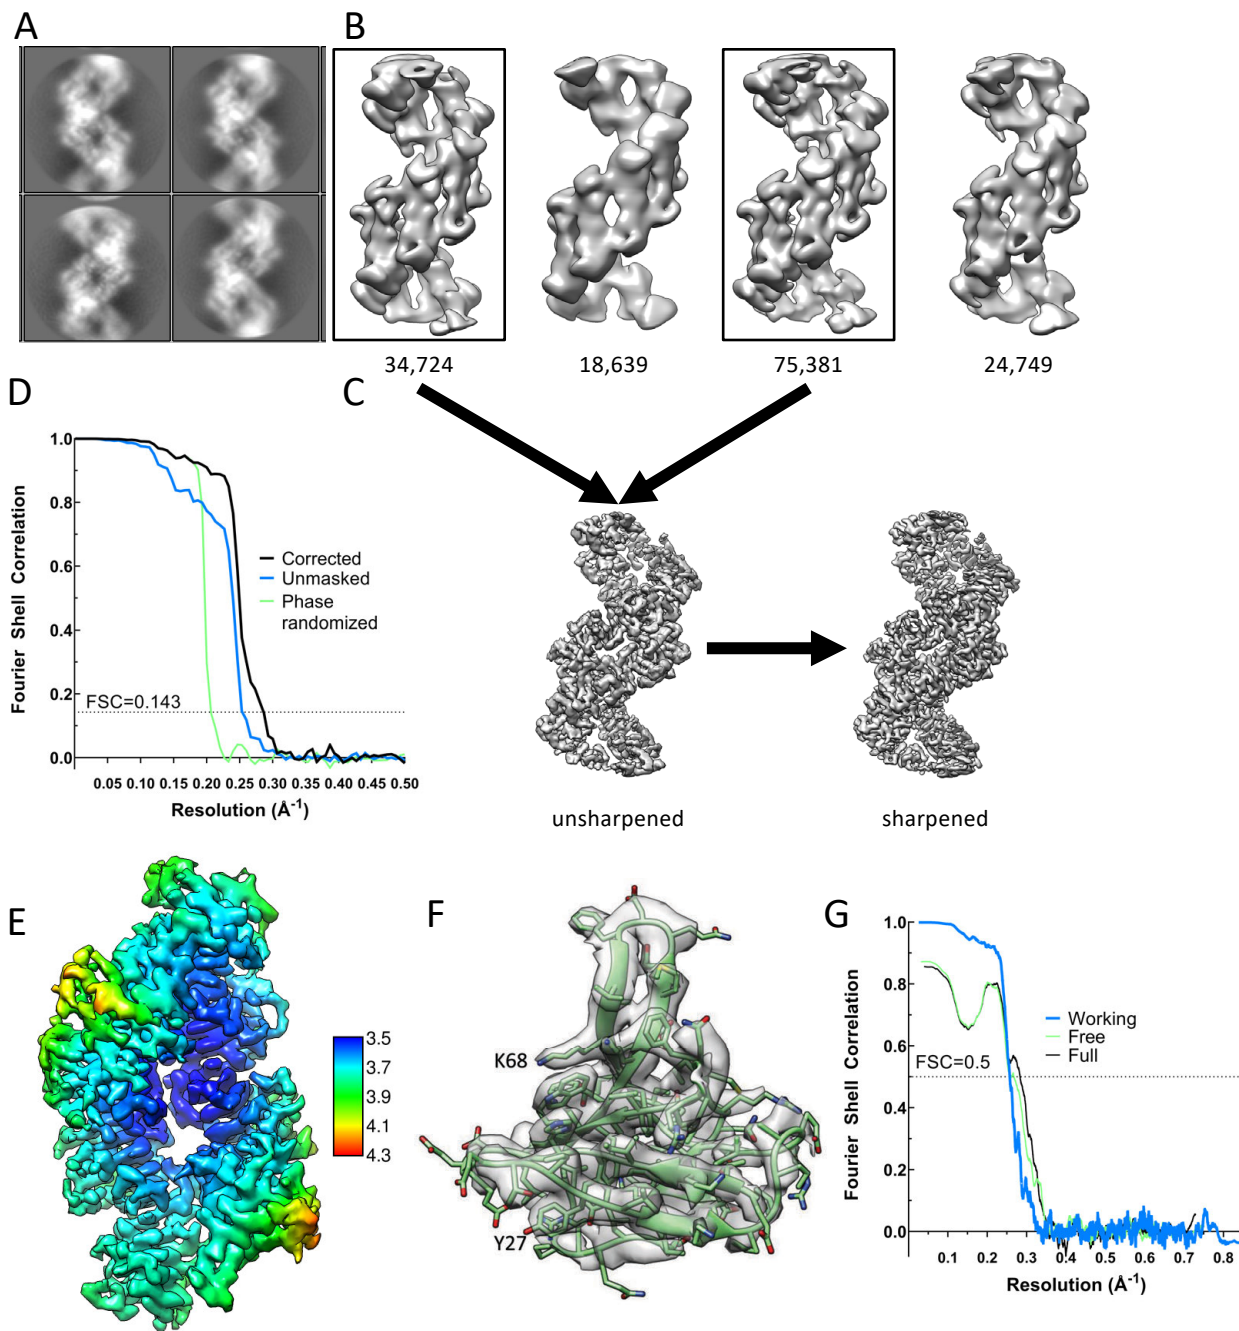

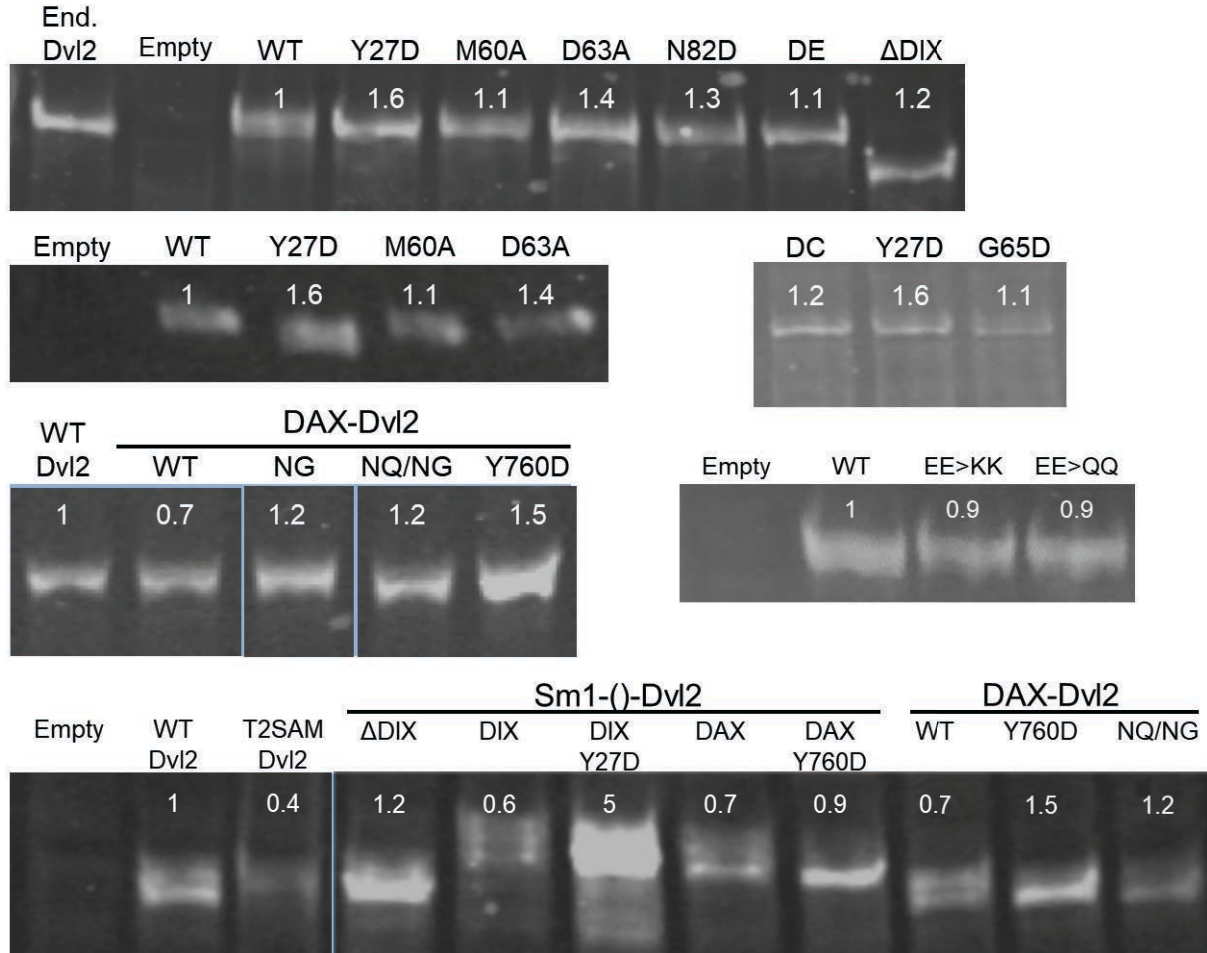

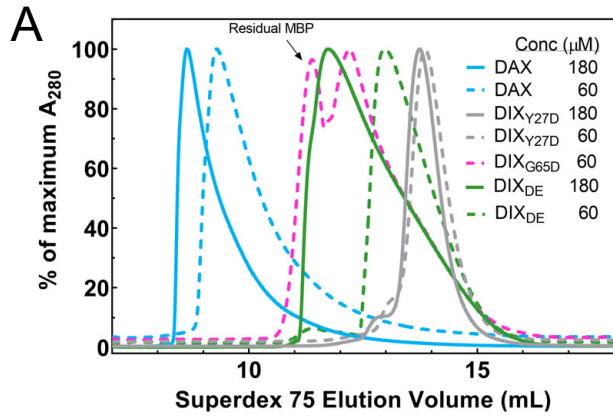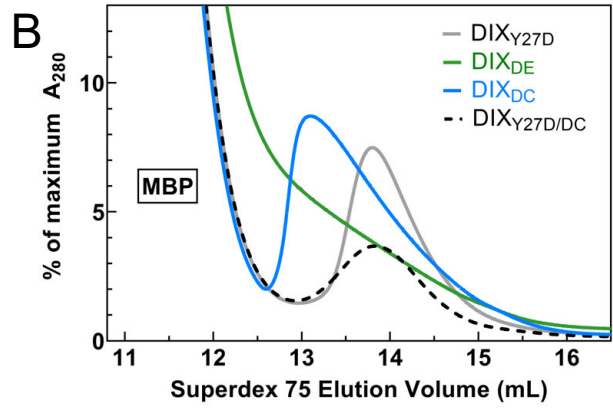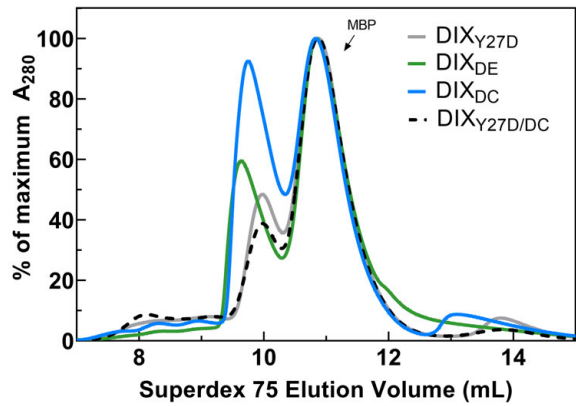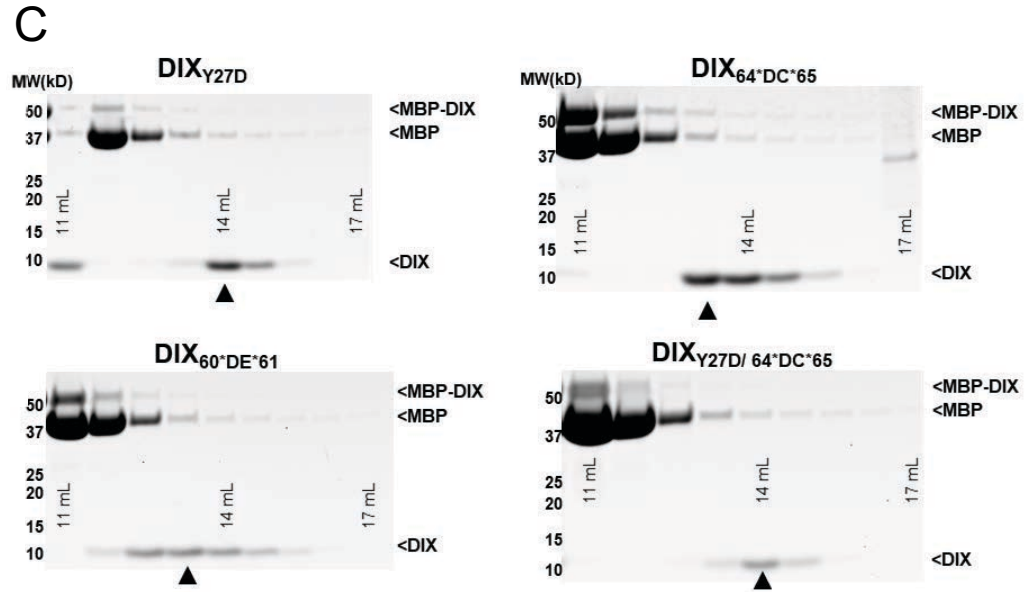

Fig. S4

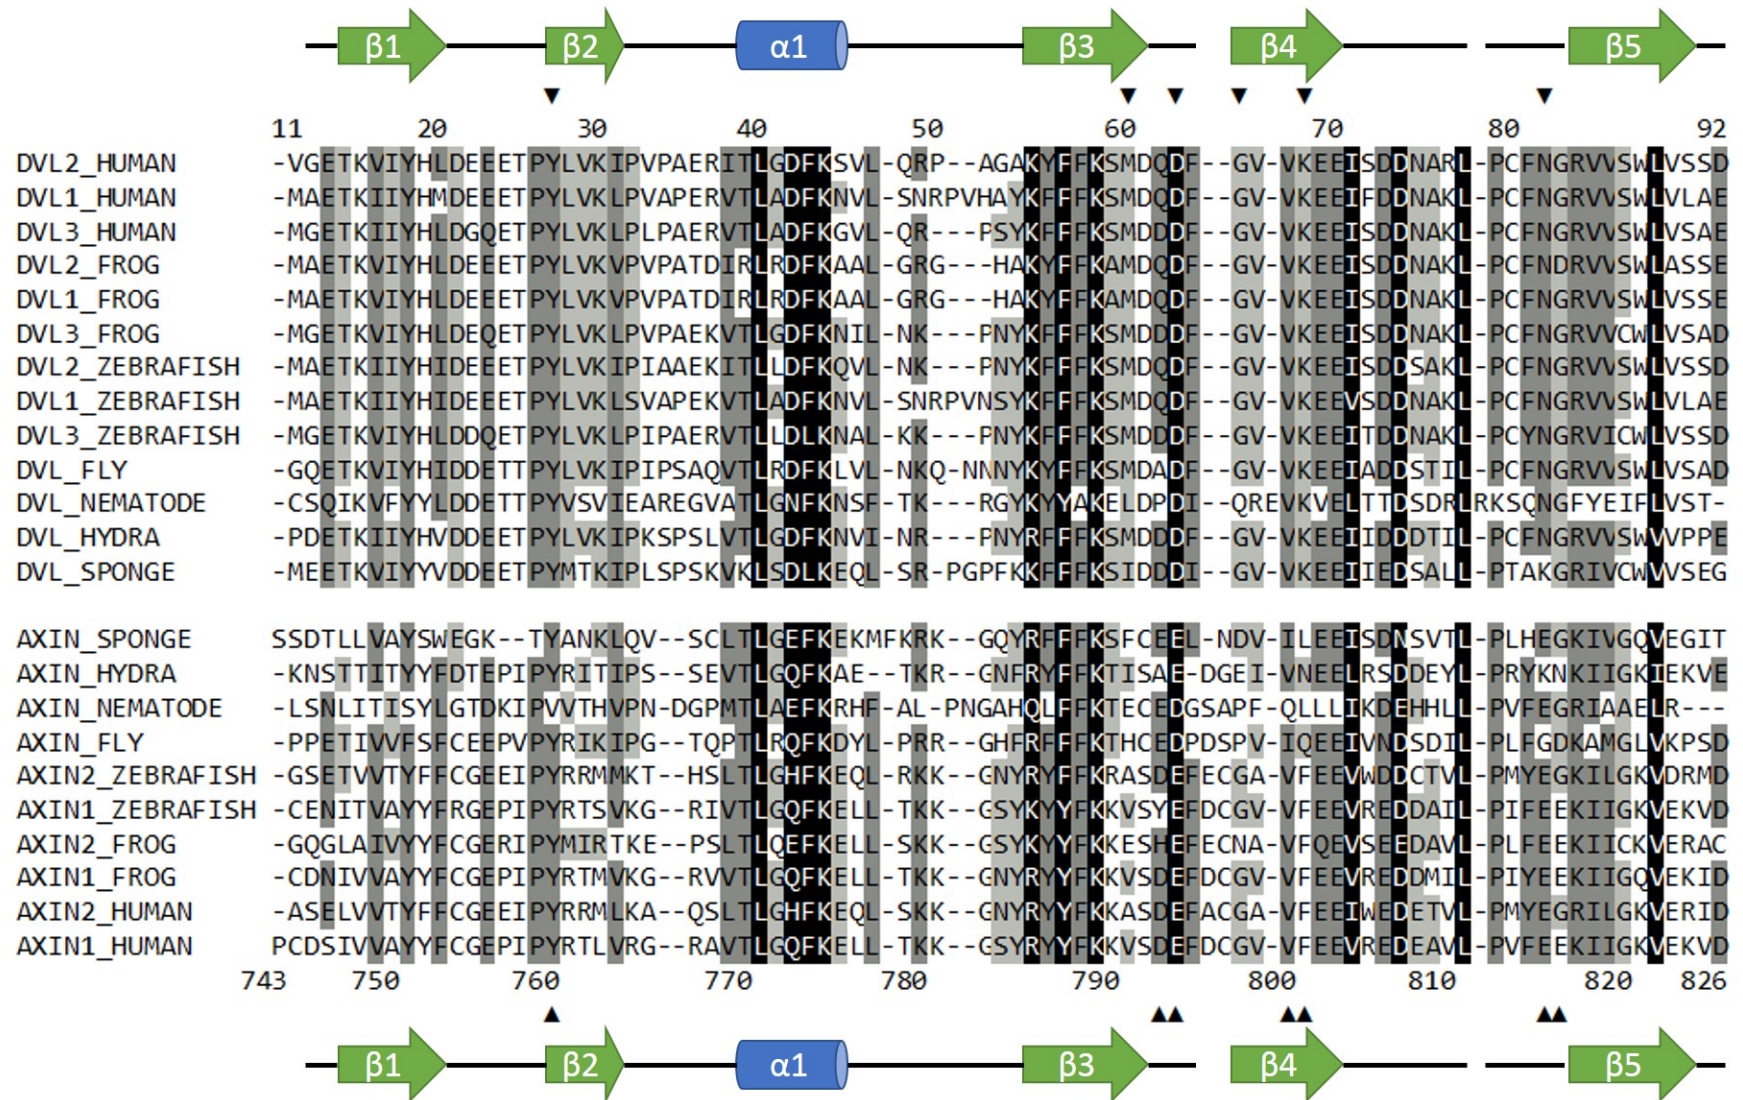



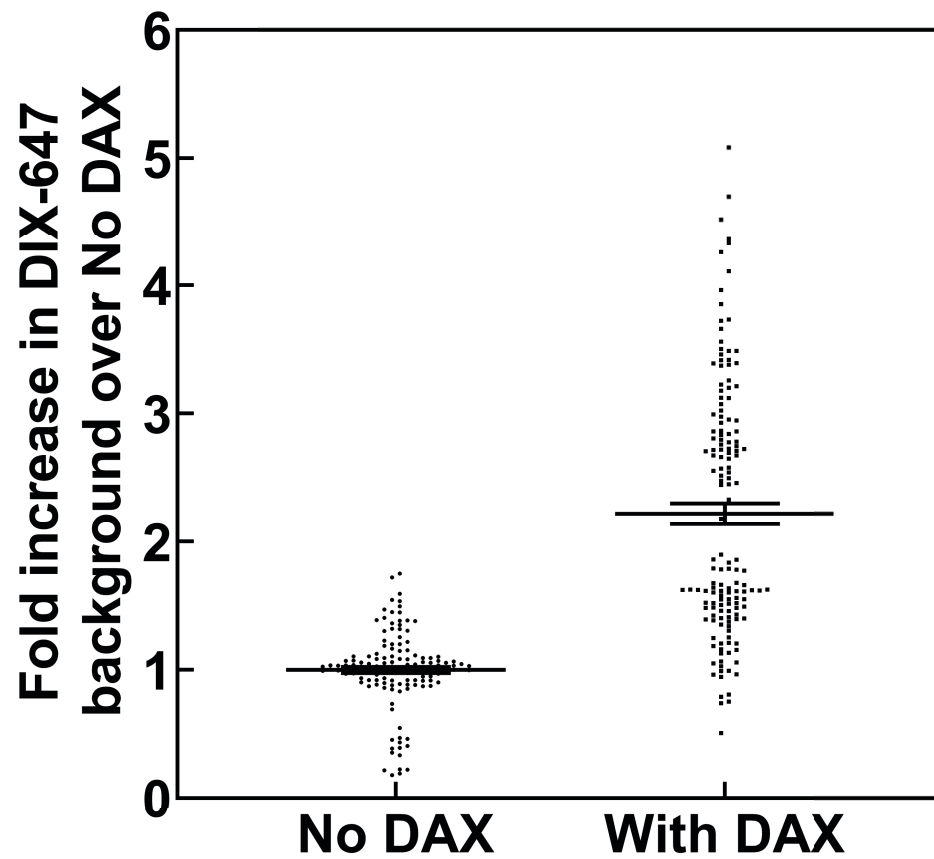

Fig. S6

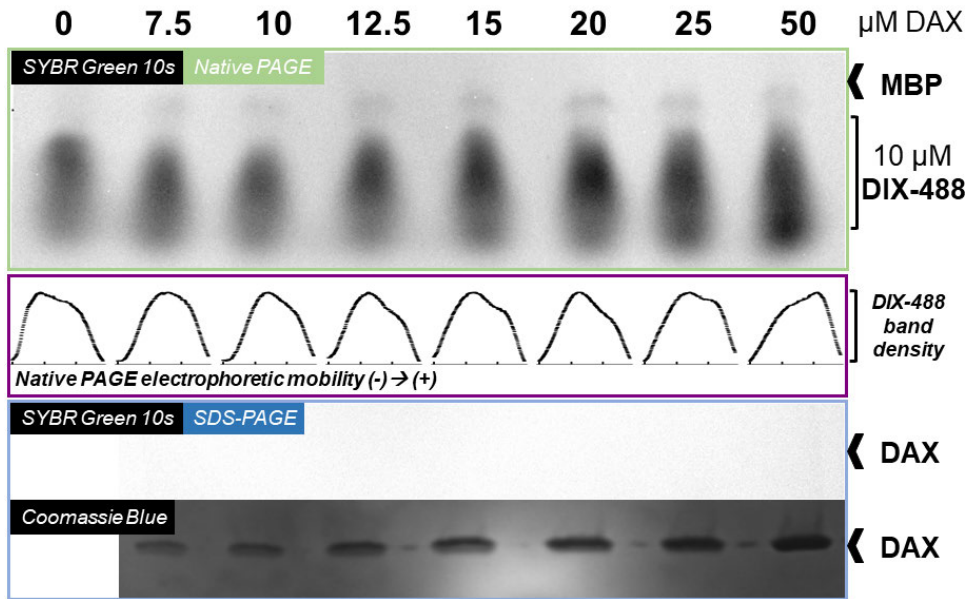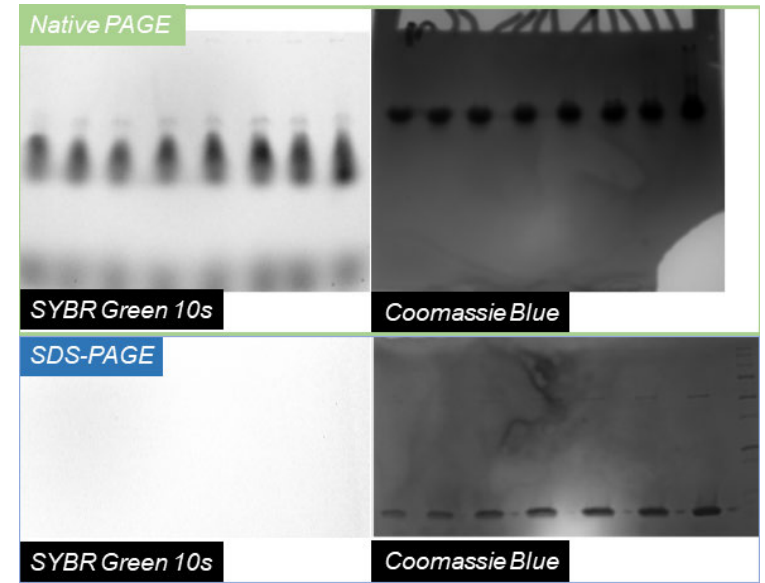

A

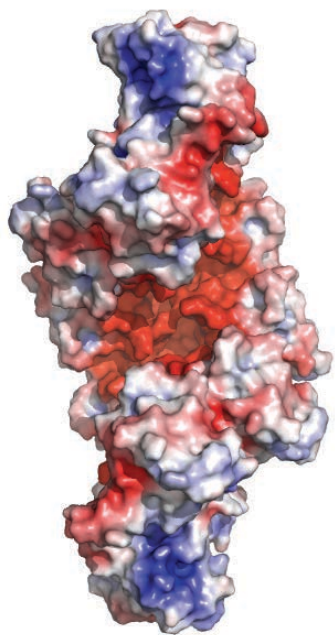

B

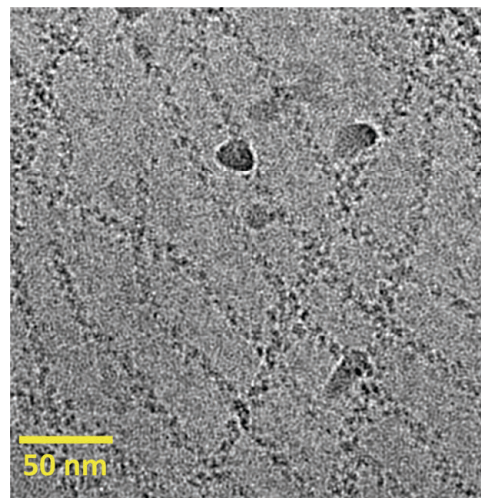

C

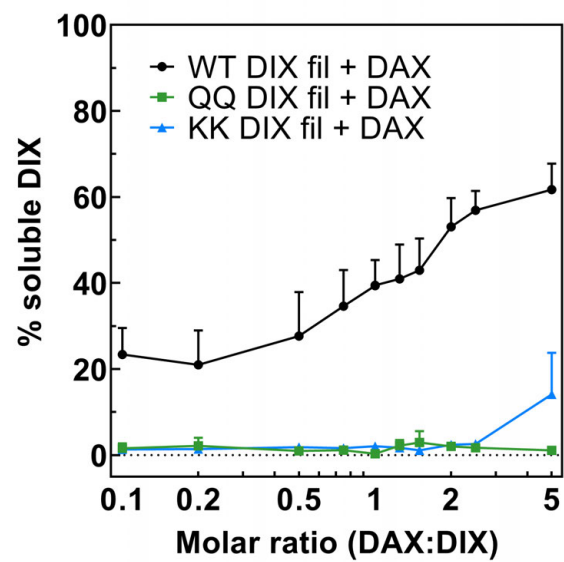

D

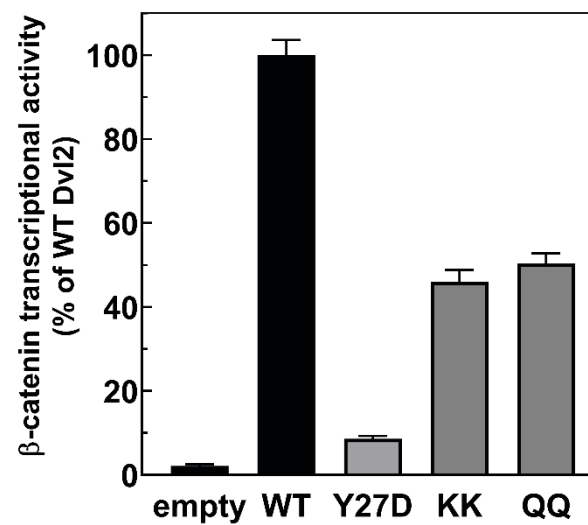

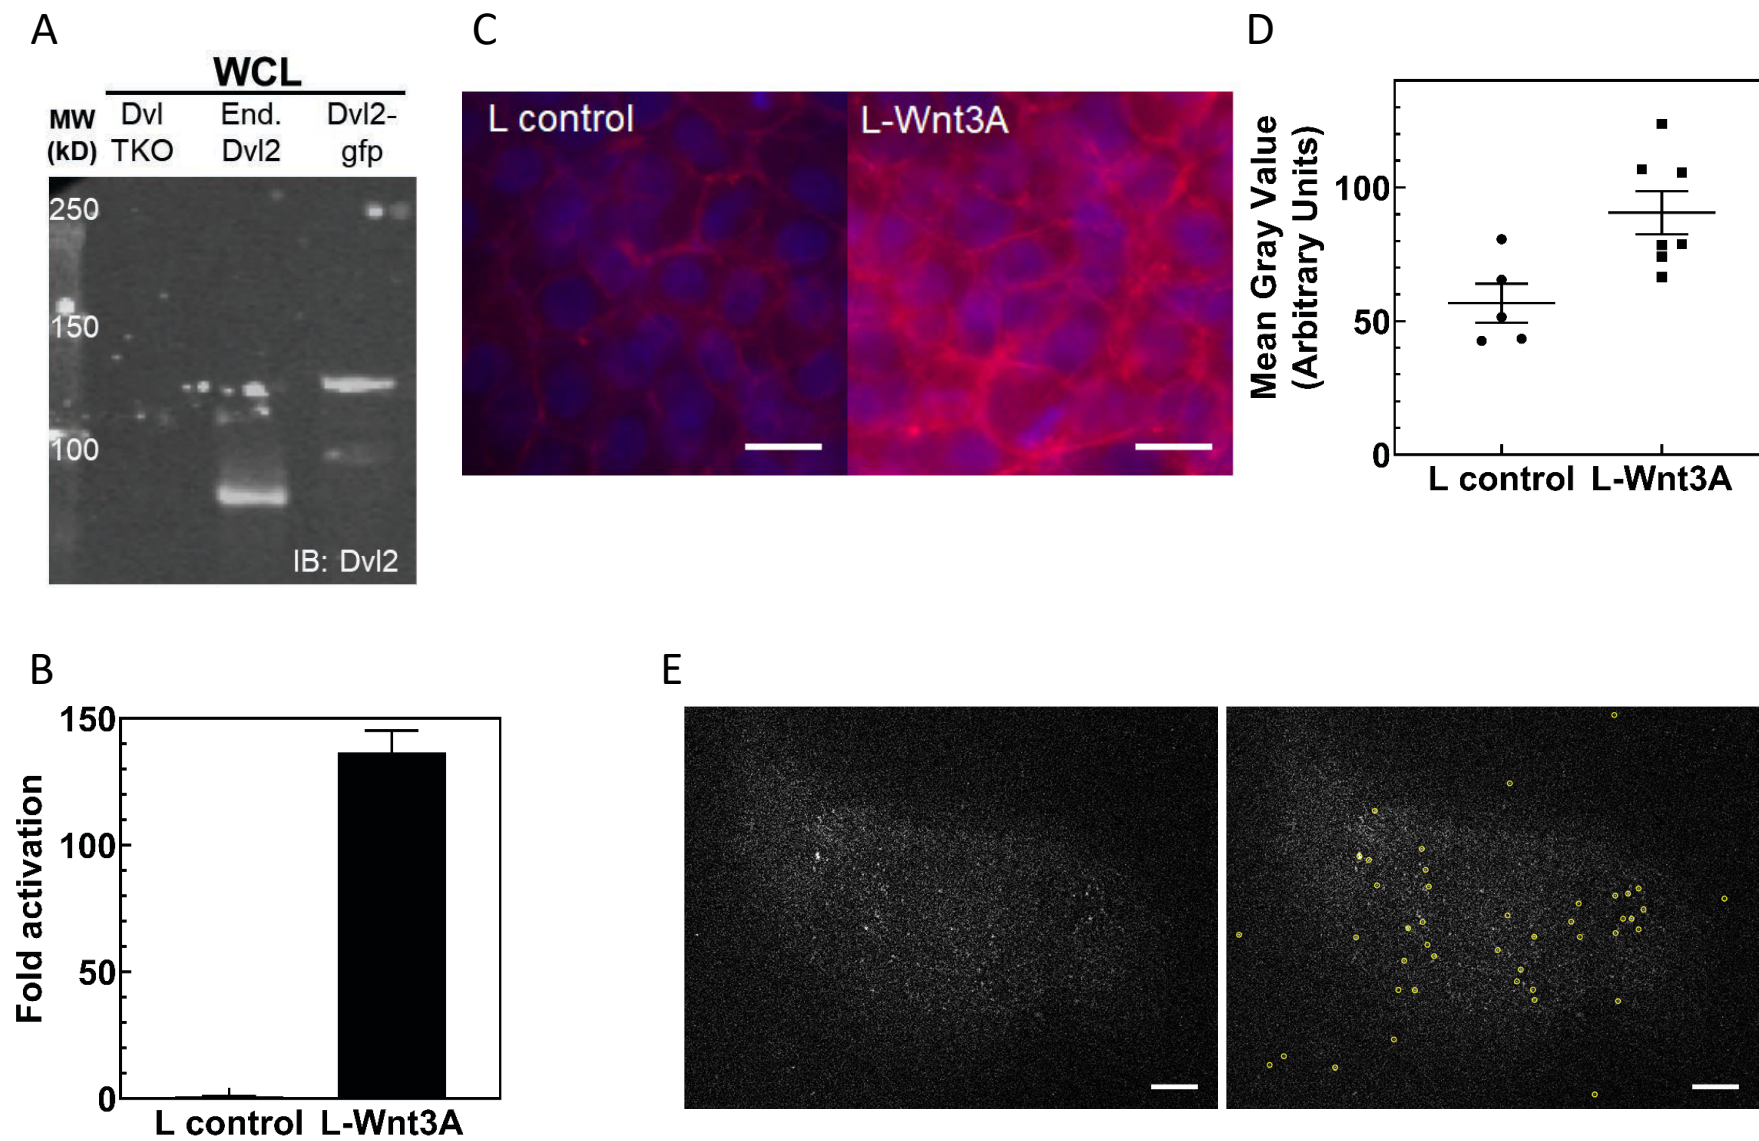

Source: https://www.biorxiv.org/content/10.1101/2020.04.01.020057v1.full.pdf
